# Supplementary material for: Concept Coverage Analysis of Ophthalmic Infections and Trauma among the Standardized Medical Terminologies SNOMED-CT, ICD-10-CM, and ICD-11
Source: PubMed Central journal article supplement — Ophthalmol Sci. 2023 May 25;3(4):100337. doi: 10.1016/j.xops.2023.100337 (PMC10336190; doi:10.1016/j.xops.2023.100337), 2023-05-25
Supplement: mmc1.pdf [file mmc1.pdf]

**Table S2. Concepts and Codes of Ophthalmic Trauma**

| Concepts                                      | UMLS     | SNOMED Code | SNOMED Name                               | SNOMED Match | ICD-10-CM Code    | ICD-10-CM Name                                                                 | ICD-10 Match | ICD-11          | ICD-11 Name                                                | ICD-11 Match | ICD-11 subgroup name                                 | ICD-11 Match |
|-----------------------------------------------|----------|-------------|-------------------------------------------|--------------|-------------------|--------------------------------------------------------------------------------|--------------|-----------------|------------------------------------------------------------|--------------|------------------------------------------------------|--------------|
| Acute symptomatic atrophic round retinal hole | C0392074 | 302888003   | Retinal round hole                        | Wide         | H33.32            | Round hole of retina without detachment                                        | Wide         | 9B73.4          | Retinal breaks without detachment                          | Wide         | No                                                   | Wide         |
| Acute symptomatic horseshoe retinal tear      | C0154826 | 193341001   | Horseshoe retinal tear without detachment | Wide         | H33.31            | Horseshoe retina tear of retina without detachment                             | Wide         | 9B73.4          | Retinal breaks without detachment                          | Wide         | No                                                   | Wide         |
| Acute symptomatic operculated retinal hole    | C0344275 | 247167001   | Retinal operculated tear                  | Wide         | H33.32            | Round hole of retina without detachment                                        | Wide         | 9B73.4          | Retinal breaks without detachment                          | Wide         | No                                                   | Wide         |
| Adnexal laceration                            | C1402105 | 111689003   | Wound of ocular adnexa                    | Wide         | S01.119 / S01.129 | Laceration without/with foreign body of unspecified eyelid and periocular area | Equal        | NA01.2 / NA01.3 | Laceration without/with foreign body of head               | Wide         | No                                                   | Wide         |
| Angle recession                               | C0154937 | 664008      | Angle recession                           | Equal        | H21.55            | Recession of chamber angle                                                     | Equal        | 9A93            | Adhesions or disruptions of iris or ciliary body           | Subgroup     | Recession of chamber angle                           | Equal        |
| Anterior chamber of the eye foreign body      | C2069979 | 231959000   | Foreign body in anterior chamber          | Equal        | H44.61/71         | Retained (old) magnetic foreign body in anterior chamber                       | Narrow       | NA06.2          | Retained foreign body following penetrating wound of orbit | Subgroup     | Retained foreign body in anterior chamber of the eye | Equal        |
| Anterior dislocation of lens                  | C0155372 | 37283009    | Anterior dislocation of lens              | Equal        | H27.12            | Anterior dislocation of lens                                                   | Equal        | 9B11.1          | Dislocation of lens                                        | Subgroup     | Anterior dislocation of lens                         | Equal        |
| Avulsion of eye                               | C0004445 | 12193006    | Avulsion of eye                           | Equal        | S05.7             | Avulsion of eye                                                                | Equal        | NA06.85 /86     | Avulsion of eye, bilateral/unilateral                      | Equal        | No                                                   | Equal        |
| Avulsion of optic nerve head                  | C0338512 | 230513000   | Avulsion of optic nerve                   | Equal        | S04.01            | Injury of optic nerve                                                          | Wide         | NA06.63         | Optic nerve avulsion                                       | Equal        | No                                                   | Equal        |
| Avulsion of vitreous base                     | C0423362 | 247082008   | Avulsion of vitreous base                 | Equal        | H43               | Disorders of vitreous body                                                     | Wide         | 9B8Y            | Other disorder of vitreous body                            | Wide         | No                                                   | Wide         |
| Blow-out fracture of orbit                    | C0347775 | 263167007   | Blow out fracture of orbit                | Equal        | S02.85            | Fracture of orbit                                                              | Wide         | NA02.21         | Orbital fracture                                           | Wide         | No                                                   | Wide         |

|                                                          |           |             |                                                      |               |         |                                                                                           |               |         |                                                        |                 |                         |               |
|----------------------------------------------------------|-----------|-------------|------------------------------------------------------|---------------|---------|-------------------------------------------------------------------------------------------|---------------|---------|--------------------------------------------------------|-----------------|-------------------------|---------------|
| <b>Chalcosis</b>                                         | C0339036  | 875001      | Chalcosis of eye                                     | <b>Equal</b>  | H44.31  | Chalcosis                                                                                 | <b>Equal</b>  | 9B7Y    | <i>Other specified disorders of the retina</i>         | <i>Subgroup</i> | Chalcosis of retina     | <b>Equal</b>  |
| <b>Chemosis of conjunctiva</b>                           | C0271298  | 8148005     | Chemosis of conjunctiva                              | <b>Equal</b>  | H11.42  | Conjunctival edema                                                                        | <b>Equal</b>  | 9A61.4Y | <i>Other specified conjunctival vascular disorders</i> | <i>Subgroup</i> | Chemosis of conjunctiva | <b>Equal</b>  |
| <b>Choroidal hemorrhage</b>                              | C0008522  | 122003      | Choroidal hemorrhage                                 | <b>Equal</b>  | H31.3   | <i>Choroidal hemorrhage and rupture</i>                                                   | <i>Narrow</i> | 9B63    | Choroidal hemorrhage or rupture                        | <b>Equal</b>    | No                      | <b>Equal</b>  |
| <b>Choroidal rupture</b>                                 | C0154903  | 2532009     | Choroidal rupture                                    | <b>Equal</b>  | H31.32  | Choroidal rupture                                                                         | <b>Equal</b>  | NA06.61 | Choroidal rupture                                      | <b>Equal</b>    | No                      | <b>Equal</b>  |
| <b>Choroidal rupture and hemorrhage</b>                  | C0154901  | 193474002   | Choroidal hemorrhage and rupture                     | <b>Equal</b>  | H31.3   | Choroidal hemorrhage and rupture                                                          | <b>Equal</b>  | 9B63    | Choroidal hemorrhage or rupture                        | <b>Equal</b>    | No                      | <b>Equal</b>  |
| <b>Closed fracture of orbital floor</b>                  | C07447052 | 1.13038E+16 | Closed fracture of orbital floor                     | <b>Equal</b>  | S02.30X | <i>Fracture of orbital floor, unspecified side, initial encounter for closed fracture</i> | <i>Narrow</i> | NA02.21 | <i>Fracture of orbital floor</i>                       | <i>Wide</i>     | No                      | <i>Wide</i>   |
| <b>Closed fracture of orbital portion zygomatic bone</b> | C1264251  | 110019000   | Closed fracture of orbital portion of zygomatic bone | <b>Equal</b>  | S02.402 | <i>Zygomatic fracture, unspecified side, initial encounter for closed fracture</i>        | <i>Narrow</i> | NA02.2Y | <i>Other specified orbital fracture</i>                | <i>Wide</i>     | No                      | <i>Wide</i>   |
| <b>Closed fracture of orbital rim</b>                    | C2106155  | 263170006   | <i>Fracture of supraorbital rim</i>                  | <i>Narrow</i> | S02.85  | <i>Fracture of orbit</i>                                                                  | <i>Wide</i>   | NA02.2Y | <i>Other specified orbital fracture</i>                | <i>Wide</i>     | No                      | <i>Wide</i>   |
| <b>Closed globe injury</b>                               | C3899529  | 721329001   | Closed injury of eyeball                             | <b>Equal</b>  | S05.90  | <i>Unspecified injury of unspecified eye and orbit</i>                                    | <i>Wide</i>   | NA06.Z  | <i>Injury of eye or orbit, unspecified</i>             | <i>Wide</i>     | No                      | <i>Wide</i>   |
| <b>Commotio retinae</b>                                  | C0271054  | 80744008    | Commotio retinae                                     | <b>Equal</b>  | S05.8x  | Berlin's disease or edema (traumatic)                                                     | <b>Equal</b>  | NA06.62 | Commotio retinae                                       | <b>Equal</b>    | No                      | <b>Equal</b>  |
| <b>Conjunctival contusion</b>                            | C1393727  | 21117005    | <i>Conjunctival Hemorrhage</i>                       | <i>Narrow</i> | H11.3   | <i>Conjunctival hemorrhage</i>                                                            | <i>Narrow</i> | NA06.4  | Contusion of conjunctiva                               | <b>Equal</b>    | No                      | <b>Equal</b>  |
| <b>Conjunctival foreign body</b>                         | C0339177  | 231866000   | Conjunctival foreign body                            | <b>Equal</b>  | T15.1   | Foreign body in conjunctival sac                                                          | <b>Equal</b>  | ND70.1  | Foreign body in conjunctival sac                       | <b>Equal</b>    | No                      | <b>Equal</b>  |
| <b>Conjunctival laceration</b>                           | C1562000  | 417750006   | Conjunctival laceration                              | <b>Equal</b>  | S05.9   | <i>Unspecified injury of eye or orbit</i>                                                 | <i>Wide</i>   | NA06.Z  | <i>Injury of eye or orbit, unspecified</i>             | <i>Wide</i>     | No                      | <i>Wide</i>   |
| <b>Conjunctival wound</b>                                | C0339176  | 231865001   | Conjunctival wound                                   | <b>Equal</b>  | S05.9   | <i>Unspecified injury of eye or orbit</i>                                                 | <i>Wide</i>   | NA06.Z  | <i>Injury of eye or orbit, unspecified</i>             | <i>Wide</i>     | No                      | <i>Wide</i>   |
| <b>Contusion of eye</b>                                  | C0438624  | 367423000   | Contusion of eye                                     | <b>Equal</b>  | S05.10  | <i>Contusion of eyeball and orbital tissues, unspecified eye</i>                          | <i>Narrow</i> | NA06.9  | Contusion of eyeball or orbital tissues                | <b>Equal</b>    | No                      | <b>Equal</b>  |
| <b>Corneal abrasion</b>                                  | C0010032  | 85848002    | Corneal abrasion                                     | <b>Equal</b>  | S05.0   | <i>Injury of conjunctiva and</i>                                                          | <i>Narrow</i> | NA06.4  | <i>Injury of conjunctiva and</i>                       | <i>Narrow</i>   | No                      | <i>Narrow</i> |

|                                     |          |           |                                |               |         |                                                                         |               |         |                                                                                     |                 |                              |               |
|-------------------------------------|----------|-----------|--------------------------------|---------------|---------|-------------------------------------------------------------------------|---------------|---------|-------------------------------------------------------------------------------------|-----------------|------------------------------|---------------|
|                                     |          |           |                                |               |         | <i>corneal abrasion without foreign body</i>                            |               |         | <i>corneal abrasion without foreign body</i>                                        |                 |                              |               |
| <b>Corneal endothelial wound</b>    | C1562639 | 416952000 | Corneal endothelial wound      | <b>Equal</b>  | S05.9   | <i>Unspecified injury of eye or orbit</i>                               | <i>Wide</i>   | NA06.4  | <i>Injury of conjunctiva and corneal abrasion without foreign body</i>              | <i>Wide</i>     | No                           | <i>Wide</i>   |
| <b>Corneal epithelial wound</b>     | C1563220 | 416713004 | Corneal epithelial wound       | <b>Equal</b>  | S05.0   | <i>Injury of conjunctiva and corneal abrasion without foreign body</i>  | <i>Narrow</i> | NA06.4  | <i>Injury of conjunctiva and corneal abrasion without foreign body</i>              | <i>Wide</i>     | No                           | <i>Wide</i>   |
| <b>Corneal erosion</b>              | C1393970 | 50792001  | Corneal erosion                | <b>Equal</b>  | H18.839 | <i>Recurrent erosion of cornea, unspecified eye</i>                     | <i>Narrow</i> | 9A78.8  | <i>Recurrent erosion of cornea</i>                                                  | <i>Subgroup</i> | Corneal erosion              | <b>Equal</b>  |
| <b>Corneal foreign body</b>         | C0161002 | 37450000  | Corneal foreign body           | <b>Equal</b>  | T15.0   | Foreign body in cornea                                                  | <b>Equal</b>  | ND70.0  | Foreign body in cornea                                                              | <b>Equal</b>    | No                           | <b>Equal</b>  |
| <b>Corneal laceration</b>           | C0521711 | 95725002  | Corneal laceration             | <b>Equal</b>  | S05.2   | <i>Ocular laceration without prolapse or loss of intraocular tissue</i> | <i>Narrow</i> | NA06.87 | <i>Ocular laceration without prolapse or loss of intraocular tissue, unilateral</i> | <i>Narrow</i>   | No                           | <i>Narrow</i> |
| <b>Corneal perforation</b>          | C0339293 | 74895004  | Perforation of cornea          | <b>Equal</b>  | H16.07  | <i>Perforated corneal ulcer(Secondary to both trauma and infection)</i> | <i>Narrow</i> | 9A76    | <i>Corneal ulcer</i>                                                                | <i>Subgroup</i> | Corneal perforation          | <b>Equal</b>  |
| <b>Corneal stromal wound</b>        | C0423253 | 246960009 | Corneal stromal wound          | <b>Equal</b>  | S05.9   | <i>Unspecified injury of eye or orbit</i>                               | <i>Wide</i>   | NA06.4  | <i>Injury of conjunctiva and corneal abrasion without foreign body</i>              | <i>Wide</i>     | No                           | <i>Wide</i>   |
| <b>Corneoscleral laceration</b>     | C1562170 | 416931008 | Corneoscleral laceration       | <b>Equal</b>  | S05.2   | <i>Ocular laceration without prolapse or loss of intraocular tissue</i> | <i>Narrow</i> | NA06.87 | <i>Ocular laceration without prolapse or loss of intraocular tissue, unilateral</i> | <i>Narrow</i>   | No                           | <i>Narrow</i> |
| <b>Cyclodialysis</b>                | C0197526 | 231957003 | <i>Traumatic cyclodialysis</i> | <i>Narrow</i> | H21.89  | <i>Other specific disorder of iris and ciliary body</i>                 | <i>Wide</i>   | 9A93    | <i>Adhesions or disruptions of iris or ciliary body</i>                             | <i>Wide</i>     | No                           | <i>Wide</i>   |
| <b>Deep retinal hemorrhage</b>      | C0271046 | 48742005  | Deep retinal hemorrhage        | <b>Equal</b>  | H35.6   | <i>Retinal hemorrhage</i>                                               | <i>Wide</i>   | 9B78.5  | <i>Retinal hemorrhage</i>                                                           | <i>Wide</i>     | No                           | <i>Wide</i>   |
| <b>Exudative retinal detachment</b> | C0271081 | 42059000  | <i>Retinal detachment</i>      | <i>Wide</i>   | H33.2   | Serous retinal detachment                                               | <b>Equal</b>  | 9B73.Y  | <i>Other specified retinal detachments or breaks</i>                                | <i>Subgroup</i> | Exudative retinal detachment | <b>Equal</b>  |

|                                      |          |           |                                   |              |                   |                                                                                |               |                   |                                                                                     |                 |                                                                |              |
|--------------------------------------|----------|-----------|-----------------------------------|--------------|-------------------|--------------------------------------------------------------------------------|---------------|-------------------|-------------------------------------------------------------------------------------|-----------------|----------------------------------------------------------------|--------------|
| <b>Eyelid laceration</b>             | C0339094 | 231816006 | Laceration of eyelid              | <b>Equal</b> | S01.119 / S01.129 | Laceration without/with foreign body of unspecified eyelid and periocular area | <b>Equal</b>  | NA01.2 / NA01.3   | Laceration without/with foreign body of head                                        | <i>Subgroup</i> | Eyelid laceration                                              | <b>Equal</b> |
| <b>Fracture of orbital floor</b>     | C0149944 | 207787008 | Fracture of orbital floor         | <b>Equal</b> | S02.3             | Fracture of orbital floor                                                      | <b>Equal</b>  | NA02.21           | Fracture of orbital floor                                                           | <b>Equal</b>    | No                                                             | <b>Equal</b> |
| <b>Fracture of orbital roof</b>      | C0272458 | 38567007  | Fracture of orbital roof          | <b>Equal</b> | S02.12            | Fracture of orbital roof                                                       | <b>Equal</b>  | NA02.20           | Fracture of orbital roof                                                            | <b>Equal</b>    | No                                                             | <b>Equal</b> |
| <b>Fracture of supraorbital rim</b>  | C034778  | 263170006 | Fracture of supraorbital rim      | <b>Equal</b> | S02.85            | <i>Fracture of orbit</i>                                                       | <i>Wide</i>   | NA02.2Y           | <i>Other specified orbital fracture</i>                                             | <i>Wide</i>     | No                                                             | <i>Wide</i>  |
| <b>Hemolytic glaucoma</b>            | C1274101 | 392030001 | Hemolytic glaucoma                | <b>Equal</b> | H40               | <i>Glaucoma</i>                                                                | <i>Wide</i>   | 9C61              | <i>Glaucoma</i>                                                                     | <i>Wide</i>     | No                                                             | <i>Wide</i>  |
| <b>Hyphema</b>                       | C0020581 | 75229002  | Hyphema                           | <b>Equal</b> | H21.0             | Hyphema                                                                        | <b>Equal</b>  | 9A80              | Hyphema                                                                             | <b>Equal</b>    | No                                                             | <b>Equal</b> |
| <b>Injury of globe of eye</b>        | C0339055 | 231794000 | Injury of globe of eye            | <b>Equal</b> | S05               | <i>Injury of eye and orbit</i>                                                 | <i>Narrow</i> | NA06.Z            | Injury of eye or orbit, unspecified                                                 | <b>Equal</b>    | No                                                             | <b>Equal</b> |
| <b>Intralenticular foreign body</b>  | C0154801 | 231969006 | Foreign body in lens              | <b>Equal</b> | H44.73 / H44.63   | Retained (nonmagnetic/magnetic) (old) foreign body in lens                     | <b>Equal</b>  | NA06.80 / NA06.81 | <i>Retained intraocular magnetic/nonmagnetic foreign body, unilateral</i>           | <i>Wide</i>     | No                                                             | <i>Wide</i>  |
| <b>Intra-ocular foreign body</b>     | C3898107 | 157361002 | Intraocular foreign body          | <b>Equal</b> | H44.70            | <i>Unspecified retained (old) intraocular foreign body, nonmagnetic</i>        | <i>Narrow</i> | NA06.8Y           | <i>Other specified traumatic injury to eyeball</i>                                  | <i>Subgroup</i> | Intra-ocular foreign body                                      | <b>Equal</b> |
| <b>Iridodialysis</b>                 | C0152246 | 45953007  | Iridodialysis                     | <b>Equal</b> | H21.53            | Iridodialysis                                                                  | <b>Equal</b>  | 9A93              | <i>Adhesions or disruptions of iris or ciliary body</i>                             | <i>Subgroup</i> | Iridodialysis                                                  | <b>Equal</b> |
| <b>Iris foreign body</b>             | C0339339 | 231960005 | Foreign body in iris              | <b>Equal</b> | H44.72 / H44.62   | Retained (nonmagnetic/magnetic) (old) foreign body in iris or ciliary body     | <b>Equal</b>  | NA06.80 / NA06.81 | <i>Retained intraocular magnetic/nonmagnetic foreign body, unilateral</i>           | <i>Subgroup</i> | Retained magnetic/nonmagnetic foreign body in iris, unilateral | <b>Equal</b> |
| <b>Laceration of eye</b>             | C0160470 | 46952005  | Laceration of eye                 | <b>Equal</b> | S05.3             | <i>Ocular laceration without prolapse or loss of intraocular tissue</i>        | <i>Narrow</i> | NA06.8D           | <i>Ocular laceration without prolapse or loss of intraocular tissue, unilateral</i> | <i>Subgroup</i> | Laceration of eye NOS                                          | <b>Equal</b> |
| <b>Lacrimal duct rupture</b>         | C1394612 | 262751001 | <i>Injury of lacrimal passage</i> | <i>Wide</i>  | H04               | <i>Disorders of lacrimal system</i>                                            | <i>Wide</i>   | NA06.Z            | <i>Injury of eye or orbit, unspecified</i>                                          | <i>Subgroup</i> | Traumatic rupture of lacrimal duct                             | <b>Equal</b> |
| <b>Lateral canthal tendon injury</b> | N/A      | 282752000 | <i>Injury of eye region</i>       | <i>Wide</i>  | S05               | <i>Injury of eye and orbit</i>                                                 | <i>Wide</i>   | NA06.Z            | <i>Injury of eye or orbit, unspecified</i>                                          | <i>Wide</i>     | No                                                             | <i>Wide</i>  |

|                                             |          |                                         |                                               |               |                 |                                                                                                  |               |                   |                                                                           |                 |                                                                |               |
|---------------------------------------------|----------|-----------------------------------------|-----------------------------------------------|---------------|-----------------|--------------------------------------------------------------------------------------------------|---------------|-------------------|---------------------------------------------------------------------------|-----------------|----------------------------------------------------------------|---------------|
| <b>Lateral orbital wall closed fracture</b> | C5140953 | 640080131000119107 / 243863351000119103 | Left/Right lateral orbit wall closed fracture | <b>Equal</b>  | S02.849.A       | <i>Fracture of lateral orbital wall, unspecified side, initial encounter for closed fracture</i> | <i>Narrow</i> | NA02.2Y           | <i>Other specified orbital fracture</i>                                   | <i>Wide</i>     | No                                                             | <i>Wide</i>   |
| <b>Lateral orbital wall fracture</b>        | C0347777 | 263169005                               | Fracture of lateral wall of orbit             | <b>Equal</b>  | S02.84          | Fracture of lateral orbital wall                                                                 | <b>Equal</b>  | NA02.2Y           | <i>Other specified orbital fracture</i>                                   | <i>Subgroup</i> | Lateral orbital wall fracture                                  | <b>Equal</b>  |
| <b>Lateral orbital wall open fracture</b>   | C5140954 | 263169005                               | <i>Fracture of lateral wall of orbit</i>      | <i>Wide</i>   | S02.849.B       | <i>Fracture of lateral orbital wall, unspecified side, initial encounter for open fracture</i>   | <i>Narrow</i> | NA02.2Y           | <i>Other specified orbital fracture</i>                                   | <i>Wide</i>     | No                                                             | <i>Wide</i>   |
| <b>Lattice degeneration</b>                 | C0154856 | 3577000                                 | Retinal lattice degeneration                  | <b>Equal</b>  | H35.41          | Lattice degeneration of retina                                                                   | <b>Equal</b>  | 9B78.4            | <i>Peripheral retinal degeneration</i>                                    | <i>Subgroup</i> | Lattice degeneration                                           | <b>Equal</b>  |
| <b>Le Fort fracture</b>                     | C0272464 | 48407005                                | Le Fort's fracture                            | <b>Equal</b>  | S02.41          | LeFort fracture                                                                                  | <b>Equal</b>  | NA02.2Y           | <i>Other specified orbital fracture</i>                                   | <i>Wide</i>     | No                                                             | <i>Wide</i>   |
| <b>Le Fort fracture type I</b>              | C0407747 | 63669006                                | Le Fort's fracture, type I                    | <b>Equal</b>  | S02.411         | Le Fort I                                                                                        | <b>Equal</b>  | NA02.40           | Le Fort fracture type I                                                   | <b>Equal</b>    | No                                                             | <b>Equal</b>  |
| <b>Le Fort fracture type II</b>             | C0407748 | 44916009                                | Le Fort's fracture, type II                   | <b>Equal</b>  | S02.412         | Le Fort II                                                                                       | <b>Equal</b>  | NA02.41           | Le Fort fracture type II                                                  | <b>Equal</b>    | No                                                             | <b>Equal</b>  |
| <b>Le Fort fracture type III</b>            | C0407749 | 37027003                                | Le Fort's fracture, type III                  | <b>Equal</b>  | S02.413         | Le Fort III                                                                                      | <b>Equal</b>  | NA02.42           | Le Fort fracture type III                                                 | <b>Equal</b>    | No                                                             | <b>Equal</b>  |
| <b>Lens dislocation</b>                     | C0023309 | 231980006                               | <i>Traumatic dislocation of lens</i>          | <i>Narrow</i> | H27.1           | Lens dislocation                                                                                 | <b>Equal</b>  | 9B11.1            | Dislocation of lens                                                       | <b>Equal</b>    | No                                                             | <b>Equal</b>  |
| <b>Lens foreign body</b>                    | C0154801 | 231969006                               | Foreign body in lens                          | <b>Equal</b>  | H44.73 / H44.63 | Retained (nonmagnetic/magnetic) (old) foreign body in lens                                       | <b>Equal</b>  | NA06.80 / NA06.81 | <i>Retained intraocular magnetic/nonmagnetic foreign body, unilateral</i> | <i>Subgroup</i> | Retained magnetic/nonmagnetic foreign body in lens, unilateral | <b>Equal</b>  |
| <b>Lens subluxation</b>                     | C0023316 | 65814009                                | Subluxation of lens                           | <b>Equal</b>  | H27.11          | Subluxation of lens                                                                              | <b>Equal</b>  | 9B11.1            | <i>Dislocation of lens</i>                                                | <i>Subgroup</i> | Subluxation of lens                                            | <b>Equal</b>  |
| <b>Limbal perforation</b>                   | N/A      | 231880007                               | Perforating corneoscleral wound               | <b>Equal</b>  | S05.9           | <i>Unspecified injury of eye or orbit</i>                                                        | <i>Wide</i>   | NA06.Z            | <i>Injury of eye or orbit, unspecified</i>                                | <i>Wide</i>     | No                                                             | <i>Wide</i>   |
| <b>Macular hole</b>                         | C002441  | 232006002                               | Macular hole                                  | <b>Equal</b>  | H35.34          | Macular cyst, hole, or pseudohole                                                                | <b>Equal</b>  | NA06.60           | <i>Traumatic macular hole</i>                                             | <i>Narrow</i>   | No                                                             | <i>Narrow</i> |
| <b>Medial canthus tendon injury</b>         | N/A      | 282752000                               | <i>Injury of eye region</i>                   | <i>Wide</i>   | S05             | <i>Injury of eye and orbit</i>                                                                   | <i>Wide</i>   | NA06.Z            | <i>Injury of eye or orbit, unspecified</i>                                | <i>Wide</i>     | No                                                             | <i>Wide</i>   |

|                                                           |          |             |                                                    |               |          |                                                                                                 |               |         |                                                                        |                 |                                        |              |
|-----------------------------------------------------------|----------|-------------|----------------------------------------------------|---------------|----------|-------------------------------------------------------------------------------------------------|---------------|---------|------------------------------------------------------------------------|-----------------|----------------------------------------|--------------|
| <b>Medial orbital fracture</b>                            | C0347776 | 263168002   | Fracture of medial wall of orbit                   | <b>Equal</b>  | S02.83   | Fracture of medial orbital wall                                                                 | <b>Equal</b>  | NA02.2Y | <i>Other specified orbital fracture</i>                                | <i>Subgroup</i> | Orbital medial wall fracture           | <b>Equal</b> |
| <b>Medial orbital wall closed fracture</b>                | C5140932 | 7.3521E+13  | Closed fracture of medial wall of orbit            | <b>Equal</b>  | S02.839A | <i>Fracture of medial orbital wall, unspecified side, initial encounter for closed fracture</i> | <i>Narrow</i> | NA02.2Y | <i>Other specified orbital fracture</i>                                | <i>Wide</i>     | No                                     | <i>Wide</i>  |
| <b>Medial orbital wall open fracture</b>                  | C3875167 | 1.13046E+16 | Open fracture of medial wall of orbit              | <b>Equal</b>  | S02.839B | <i>Fracture of medial orbital wall, unspecified side, initial encounter for open fracture</i>   | <i>Narrow</i> | NA02.2Y | <i>Other specified orbital fracture</i>                                | <i>Wide</i>     | No                                     | <i>Wide</i>  |
| <b>Non perforating wound of cornea</b>                    | C0339291 | 231941003   | Nonperforating wound of cornea                     | <b>Equal</b>  | S05.9    | <i>Unspecified injury of eye or orbit</i>                                                       | <i>Wide</i>   | NA06.4  | <i>Injury of conjunctiva and corneal abrasion without foreign body</i> | <i>Wide</i>     | No                                     | <i>Wide</i>  |
| <b>Ocular adnexa open wound</b>                           | C0160459 | 16998003    | Open wound of ocular adnexa                        | <b>Equal</b>  | S05      | <i>Injury of eye and orbit</i>                                                                  | <i>Wide</i>   | NA06.04 | <i>Open wound of eyelid or periorcular area</i>                        | <i>Subgroup</i> | Open wound of ocular adnexa            | <b>Equal</b> |
| <b>Open fracture of orbital floor</b>                     | C0339151 | 3421000     | Open fracture of orbital floor (blow-out)          | <b>Equal</b>  | S02.3    | <i>Fracture of orbital floor</i>                                                                | <i>Wide</i>   | NA02.21 | <i>Fracture of orbital floor</i>                                       | <i>Wide</i>     | No                                     | <i>Wide</i>  |
| <b>Open fracture of orbital portion of zygomatic bone</b> | C1264252 | 110020006   | Open fracture of orbital portion of zygomatic bone | <b>Equal</b>  | S02.402B | <i>Zygomatic fracture, unspecified side, initial encounter for open fracture</i>                | <i>Narrow</i> | NA02.2Y | <i>Other specified orbital fracture</i>                                | <i>Wide</i>     | No                                     | <i>Wide</i>  |
| <b>Open fracture of orbital rim</b>                       | C2118116 | 263170006   | <i>Fracture of supraorbital rim</i>                | <i>Narrow</i> | S02.85   | <i>Fracture of orbit</i>                                                                        | <i>Wide</i>   | NA02.2Y | <i>Other specified orbital fracture</i>                                | <i>Wide</i>     | No                                     | <i>Wide</i>  |
| <b>Open globe injury</b>                                  | C3898098 | 231794000   | <i>Injury of globe of eye</i>                      | <i>Wide</i>   | S05      | <i>Injury of eye and orbit</i>                                                                  | <i>Wide</i>   | NA06.8Y | <i>Other specified traumatic injury to eyeball</i>                     | <i>Wide</i>     | No                                     | <i>Wide</i>  |
| <b>Open injury of the eyeball</b>                         | C0160474 | 231794000   | <i>Injury of globe of eye</i>                      | <i>Wide</i>   | S05      | <i>Injury of eye and orbit</i>                                                                  | <i>Wide</i>   | NA06.8Y | <i>Other specified traumatic injury to eyeball</i>                     | <i>Subgroup</i> | Open injury of the eyeball, unilateral | <b>Equal</b> |
| <b>Open wound of eyelid</b>                               | C0433978 | 262749000   | Open wound of eyelid                               | <b>Equal</b>  | S01.1    | Open wound of eyelid                                                                            | <b>Equal</b>  | NA06.04 | Open wound of eyelid or periorcular area                               | <b>Equal</b>    | No                                     | <b>Equal</b> |
| <b>Orbital apex fracture</b>                              | N/A      | 95851007    | <i>Fracture of orbit</i>                           | <i>Wide</i>   | S02.85   | <i>Fracture of orbit, unspecified</i>                                                           | <i>Wide</i>   | NA02.2Y | <i>Other specified orbital fracture</i>                                | <i>Wide</i>     | No                                     | <i>Wide</i>  |

|                                          |          |           |                                    |              |                 |                                                                               |              |         |                                                                        |                 |                                                             |              |
|------------------------------------------|----------|-----------|------------------------------------|--------------|-----------------|-------------------------------------------------------------------------------|--------------|---------|------------------------------------------------------------------------|-----------------|-------------------------------------------------------------|--------------|
| <b>Orbital compartment syndrome</b>      | C0009492 |           | Unmatched                          |              |                 | Unmatched                                                                     |              |         | Unmatched                                                              |                 | No                                                          |              |
| <b>Orbital foreign body</b>              | C0339154 | 231852005 | Orbital foreign body               | <b>Equal</b> | T15             | <i>Foreign body on external eye</i>                                           | <i>Wide</i>  | NA06.2  | <i>Retained foreign body following penetrating wound of orbit</i>      | <i>Wide</i>     | No                                                          | <i>Wide</i>  |
| <b>Orbital fracture</b>                  | C0029184 | 95851007  | Fracture of orbit                  | <b>Equal</b> | S02.85          | Fracture of orbit, unspecified                                                | <b>Equal</b> | NA02.2  | Orbital fracture                                                       | <b>Equal</b>    | No                                                          | <b>Equal</b> |
| <b>Penetrating lens injury</b>           | C1402252 | 416786002 | Penetrating injury of lens         | <b>Equal</b> | S05.9           | <i>Unspecified injury of eye or orbit</i>                                     | <i>Wide</i>  | NA06.84 | <i>Penetrating wound of eyeball, without foreign body, unilateral</i>  | <i>Subgroup</i> | Penetrating injury of lens without foreign body, unilateral | <b>Equal</b> |
| <b>Perforating corneoscleral wound</b>   | C0339199 | 231880007 | Perforating corneoscleral wound    | <b>Equal</b> | S05             | <i>Injury of eye and orbit</i>                                                | <i>Wide</i>  | NA06.4  | <i>Injury of conjunctiva and corneal abrasion without foreign body</i> | <i>Wide</i>     | No                                                          | <i>Wide</i>  |
| <b>Perforating lens injury</b>           | C1562405 | 416068009 | Perforating injury of lens         | <b>Equal</b> | S05.9           | <i>Unspecified injury of eye or orbit</i>                                     | <i>Wide</i>  | NA06.84 | <i>Penetrating wound of eyeball, without foreign body, unilateral</i>  | <i>Wide</i>     | No                                                          | <i>Wide</i>  |
| <b>Phthisis bulbi</b>                    | C0271007 | 111510002 | Phthisis bulbi                     | <b>Equal</b> | H44.9           | <i>Disorder of globe</i>                                                      | <i>Wide</i>  | 9C22.1  | Phthisis bulbi                                                         | <b>Equal</b>    | No                                                          | <b>Equal</b> |
| <b>Posterior dislocation of the lens</b> | C0155373 | 14169000  | Posterior dislocation of lens      | <b>Equal</b> | H27.13          | Posterior dislocation of lens                                                 | <b>Equal</b> | 9B11.1  | <i>Dislocation of lens</i>                                             | <i>Subgroup</i> | Posterior dislocation of the lens                           | <b>Equal</b> |
| <b>Posterior eye wall foreign body</b>   | C0154803 | 231883009 | Foreign body in posterior wall eye | <b>Equal</b> | H44.74 / H44.64 | Retained (nonmagnetic/magnetic) (old) foreign body in posterior wall of globe | <b>Equal</b> | NA06.2  | <i>Retained foreign body following penetrating wound of orbit</i>      | <i>Wide</i>     | No                                                          | <i>Wide</i>  |
| <b>Posterior vitreous detachment</b>     | C0423361 | 247081001 | Posterior vitreous detachment      | <b>Equal</b> | H43.81          | <i>Vitreous degeneration</i>                                                  | <i>Wide</i>  | 9B81    | Posterior vitreous detachment                                          | <b>Equal</b>    | No                                                          | <b>Equal</b> |
| <b>Posttraumatic chorioretinal scar</b>  | C0271031 | 16150008  | Posttraumatic chorioretinal scar   | <b>Equal</b> | H31.0           | <i>Chorioretinal scars</i>                                                    | <i>Wide</i>  | 9B62    | <i>Chorioretinal scars</i>                                             | <i>Wide</i>     | No                                                          | <i>Wide</i>  |
| <b>Post-traumatic endophthalmitis</b>    | C1282230 | 314547001 | Post-traumatic endophthalmitis     | <b>Equal</b> | H44.1           | <i>Other endophthalmitis</i>                                                  | <i>Wide</i>  | 9B72.Y  | <i>Other specified inflammatory diseases of the retina</i>             | <i>Subgroup</i> | Post-traumatic bacterial endophthalmitis                    | <b>Equal</b> |
| <b>Post-traumatic uveitis</b>            | C1281936 | 314030005 | Post-traumatic uveitis             | <b>Equal</b> | H44.13          | Sympathetic uveitis                                                           | <b>Equal</b> | 9C21.0  | Sympathetic uveitis                                                    | <b>Equal</b>    | No                                                          | <b>Equal</b> |

|                                         |          |           |                                   |              |         |                                                                       |               |                 |                                                                                  |                 |                                            |               |
|-----------------------------------------|----------|-----------|-----------------------------------|--------------|---------|-----------------------------------------------------------------------|---------------|-----------------|----------------------------------------------------------------------------------|-----------------|--------------------------------------------|---------------|
| <b>Preretinal hemorrhage</b>            | C4316879 | 11547003  | Preretinal hemorrhage             | <b>Equal</b> | H35.6   | Retinal hemorrhage                                                    | <i>Wide</i>   | 9B78.5          | Retinal hemorrhage                                                               | <i>Subgroup</i> | Preretinal hemorrhage                      | <b>Equal</b>  |
| <b>Proliferative vitreoretinopathy</b>  | C0242852 | 232016005 | Proliferative vitreoretinopathy   | <b>Equal</b> | H35.2   | <i>Other non-diabetic proliferative retinopathy, unspecified eye</i>  | <i>Wide</i>   | 9B78.2          | <i>Other proliferative retinopathy</i>                                           | <i>Subgroup</i> | Proliferative vitreoretinopathy            | <b>Equal</b>  |
| <b>Purtscher retinopathy</b>            | C0339488 | 232030000 | Purtscher's retinopathy           | <b>Equal</b> | H34.9   | <i>Unspecified retinal vascular occlusion</i>                         | <i>Wide</i>   | 9B71            | <i>Retinopathy</i>                                                               | <i>Wide</i>     | No                                         | <i>Wide</i>   |
| <b>Retinal detachment</b>               | C0035305 | 42059000  | Retinal detachment                | <b>Equal</b> | H33.0   | <i>Retinal detachment with break</i>                                  | <i>Narrow</i> | 9B73            | Retinal detachments or breaks                                                    | <b>Equal</b>    | No                                         | <b>Equal</b>  |
| <b>Retinal dialysis</b>                 | C0035321 | 232003005 | Retinal dialysis                  | <b>Equal</b> | H33.04  | <i>Retinal detachment with retinal dialysis</i>                       | <i>Narrow</i> | 9B73.0          | <i>Retinal detachment with break</i>                                             | <i>Subgroup</i> | Retinal dialysis                           | <b>Equal</b>  |
| <b>Retinal dot hemorrhage</b>           | C0474358 | 247133006 | Retinal dot hemorrhage            | <b>Equal</b> | H35.6   | <i>Retinal hemorrhage</i>                                             | <i>Wide</i>   | 9B78.5          | <i>Retinal hemorrhage</i>                                                        | <i>Wide</i>     | No                                         | <i>Wide</i>   |
| <b>Retinal flame hemorrhage</b>         | C0474357 | 247132001 | Retinal flame hemorrhage          | <b>Equal</b> | H35.6   | <i>Retinal hemorrhage</i>                                             | <i>Wide</i>   | 9B78.5          | <i>Retinal hemorrhage</i>                                                        | <i>Wide</i>     | No                                         | <i>Wide</i>   |
| <b>Retinal hemorrhage</b>               | C0035317 | 28998008  | Retinal hemorrhage                | <b>Equal</b> | H35.6   | Retinal hemorrhage                                                    | <b>Equal</b>  | 9B78.5          | Retinal hemorrhage                                                               | <b>Equal</b>    | No                                         | <b>Equal</b>  |
| <b>Retinal perforation</b>              | C0035321 | 40024006  | <i>Retinal defect</i>             | <i>Wide</i>  | H33.0   | <i>Retinal detachment with break</i>                                  | <i>Wide</i>   | 9B73            | <i>Retinal detachment with break</i>                                             | <i>Wide</i>     | No                                         | <i>Wide</i>   |
| <b>Retinal tear</b>                     | C4552653 | 95690009  | Retinal tear                      | <b>Equal</b> | H33.03  | <i>Retinal detachment with giant retinal tear</i>                     | <i>Narrow</i> | 9B73.0 / 9B73.4 | <i>Retinal detachment with retinal break / Retinal breaks without detachment</i> | <i>Subgroup</i> | Retinal detachment with giant retinal tear | <b>Equal</b>  |
| <b>Retinitis sclopetaria</b>            | C1828151 | 424757003 | Retinitis sclopetaria             | <b>Equal</b> | H30.103 | <i>Unspecified disseminated chorioretinal inflammation, bilateral</i> | <i>Wide</i>   | 9B65.2          | <i>Chorioretinal inflammation</i>                                                | <i>Wide</i>     | No                                         | <i>Wide</i>   |
| <b>Retinoschisis</b>                    | C0152439 | 44268007  | Retinoschisis                     | <b>Equal</b> | H33.10  | Unspecified retinoschisis                                             | <b>Equal</b>  | 9B73.1          | Retinoschisis                                                                    | <b>Equal</b>    | No                                         | <b>Equal</b>  |
| <b>Retrolbulbar foreign body</b>        | C0271329 | 27288007  | Retrolbulbar foreign body         | <b>Equal</b> | T15     | <i>Foreign body on external eye</i>                                   | <i>Wide</i>   | ND70            | <i>Foreign body on external eye</i>                                              | <i>Wide</i>     | No                                         | <i>Wide</i>   |
| <b>Rhegmatogenous retina detachment</b> | C0271055 | 19620000  | Rhegmatogenous retinal detachment | <b>Equal</b> | H33.0   | Retinal detachment with retinal break                                 | <b>Equal</b>  | 9B73.0          | Retinal detachment with retinal break                                            | <b>Equal</b>    | No                                         | <b>Equal</b>  |
| <b>Rupture of descemet membrane</b>     | C0155117 | 193822005 | Descemet's membrane rupture       | <b>Equal</b> | H18.33  | Rupture in Descemet's membrane                                        | <b>Equal</b>  | 9A78.3          | <i>Changes in corneal membranes</i>                                              | <i>Subgroup</i> | Rupture of descemet membrane               | <b>Equal</b>  |
| <b>Rupture of the globe</b>             | C0339052 | 231791008 | Rupture of globe                  | <b>Equal</b> | S05.2   | <i>Ocular laceration and rupture with</i>                             | <i>Narrow</i> | NA06.80D        | Ocular laceration without prolapse or loss of                                    | <i>Narrow</i>   | No                                         | <i>Narrow</i> |



|                                       |          |           |                                        |              |        |                                                                                     |               |         |                                                      |                 |                               |              |
|---------------------------------------|----------|-----------|----------------------------------------|--------------|--------|-------------------------------------------------------------------------------------|---------------|---------|------------------------------------------------------|-----------------|-------------------------------|--------------|
|                                       |          |           |                                        |              |        | <i>prolapse or loss of intraocular tissue</i>                                       |               |         | intraocular tissue, unilateral                       |                 |                               |              |
| <b>Scleral Laceration</b>             | C0521769 | 95799000  | Scleral laceration                     | <b>Equal</b> | S05.3  | <i>Ocular laceration without prolapse or loss of intraocular tissue</i>             | <i>Narrow</i> | NA06.Z  | <i>Injury of eye or orbit, unspecified</i>           | <i>Wide</i>     | No                            | <i>Wide</i>  |
| <b>Scleral rupture</b>                | C0339200 | 231881006 | Scleral rupture                        | <b>Equal</b> | S05.2  | <i>Ocular laceration and rupture without prolapse or loss of intraocular tissue</i> | <i>Narrow</i> | NA06.Z  | <i>Injury of eye or orbit, unspecified</i>           | <i>Wide</i>     | No                            | <i>Wide</i>  |
| <b>Siderosis bulbi</b>                | C0271001 | 25277000  | Siderosis of eye                       | <b>Equal</b> | H44.32 | Siderosis of eye                                                                    | <b>Equal</b>  | 9B7Y    | <i>Other specified disorders of retina</i>           | <i>Wide</i>     | No                            | <i>Wide</i>  |
| <b>Subconjunctival hemorrhage</b>     | C0038534 | 787680009 | Subconjunctival hemorrhage             | <b>Equal</b> | H11.3  | <i>Conjunctival hemorrhage</i>                                                      | <i>Wide</i>   | 9A61.5  | Conjunctival or subconjunctival hemorrhage           | <b>Equal</b>    | No                            | <b>Equal</b> |
| <b>Superficial retinal hemorrhage</b> | C0271047 | 63297008  | Superficial retinal hemorrhage         | <b>Equal</b> | H35.6  | <i>Retinal hemorrhage</i>                                                           | <i>Wide</i>   | 9B78.5  | <i>Retinal hemorrhage</i>                            | <i>Wide</i>     | No                            | <i>Wide</i>  |
| <b>Sympathetic ophthalmia</b>         | C0029077 | 75315001  | Sympathetic uveitis                    | <b>Equal</b> | H44.13 | Sympathetic uveitis                                                                 | <b>Equal</b>  | 9C21.0  | Sympathetic uveitis                                  | <b>Equal</b>    | No                            | <b>Equal</b> |
| <b>Tear of iris root</b>              | C0339334 | 231953004 | Tear of iris root                      | <b>Equal</b> | S05.9  | <i>Unspecified injury of eye or orbit</i>                                           | <i>Wide</i>   | NA06.Z  | <i>Injury of eye or orbit, unspecified</i>           | <i>Wide</i>     | No                            | <i>Wide</i>  |
| <b>Tear of iris stroma</b>            | C0339333 | 231952009 | Tear of iris stroma                    | <b>Equal</b> | S05.9  | <i>Unspecified injury of eye or orbit</i>                                           | <i>Wide</i>   | NA06.Z  | <i>Injury of eye or orbit, unspecified</i>           | <i>Wide</i>     | No                            | <i>Wide</i>  |
| <b>Terson syndrome</b>                | C0730313 | 312946000 | Terson's syndrome                      | <b>Equal</b> | S05.9  | <i>Unspecified injury of eye or orbit</i>                                           | <i>Wide</i>   | NA06.Z  | <i>Injury of eye or orbit, unspecified</i>           | <i>Wide</i>     | No                            | <i>Wide</i>  |
| <b>Tractional retinal detachment</b>  | C0154827 | 42059000  | <i>Retinal detachment</i>              | <i>Wide</i>  | H33.4  | Traction detachment of retina                                                       | <b>Equal</b>  | 9B73.Y  | <i>Other specified retinal detachments or breaks</i> | <i>Subgroup</i> | Tractional retinal detachment | <b>Equal</b> |
| <b>Traumatic blindness</b>            | C0273484 | 23653003  | Traumatic blindness                    | <b>Equal</b> | H54    | <i>Blindness and low vision</i>                                                     | <i>Wide</i>   | 9D90    | <i>Vision impairment includes blindness</i>          | <i>Subgroup</i> | Traumatic blindness           | <b>Equal</b> |
| <b>Traumatic cataract</b>             | C0154983 | 34361001  | Traumatic cataract                     | <b>Equal</b> | H26.1  | Traumatic cataract                                                                  | <b>Equal</b>  | 9B10.20 | Traumatic cataract                                   | <b>Equal</b>    | No                            | <b>Equal</b> |
| <b>Traumatic cyclodialysis</b>        | C0339338 | 231957003 | Traumatic cyclodialysis                | <b>Equal</b> | H21.89 | <i>Other specific disorder of iris and ciliary body</i>                             | <i>Wide</i>   | 9A94.Y  | <i>Other disorders of iris and ciliary body</i>      | <i>Wide</i>     | No                            | <i>Wide</i>  |
| <b>Traumatic glaucoma</b>             | C0339594 | 68241007  | Glaucoma associated with ocular trauma | <b>Equal</b> | H40.3  | Glaucoma secondary to eye trauma                                                    | <b>Equal</b>  | 9C61.29 | Glaucoma due to eye trauma                           | <b>Equal</b>    | No                            | <b>Equal</b> |
| <b>Traumatic hyphema</b>              | C0339335 | 231954005 | Traumatic hyphema                      | <b>Equal</b> | H21.0  | <i>Hyphema</i>                                                                      | <i>Wide</i>   | 9A80    | <i>Hyphema</i>                                       | <i>Subgroup</i> | Traumatic hyphema             | <b>Equal</b> |
| <b>Traumatic iris atrophy</b>         | C0339332 | 231951002 | Traumatic iris atrophy                 | <b>Equal</b> | H21.29 | <i>Other iris atrophy</i>                                                           | <i>Wide</i>   | 9A90.2  | <i>Iris atrophy</i>                                  | <i>Wide</i>     | No                            | <i>Wide</i>  |

|                                             |          |           |                                        |               |                   |                                                                                      |              |                   |                                                                           |                 |                                                                    |              |
|---------------------------------------------|----------|-----------|----------------------------------------|---------------|-------------------|--------------------------------------------------------------------------------------|--------------|-------------------|---------------------------------------------------------------------------|-----------------|--------------------------------------------------------------------|--------------|
| <b>Traumatic iritis</b>                     | C0745402 | 417020006 | Traumatic iritis                       | <b>Equal</b>  | H20.049           | <i>Secondary noninfectious iridocyclitis, unspecified eye</i>                        | <i>Wide</i>  | 9A94.Y            | <i>Other disorders of iris and ciliary body</i>                           | <i>Wide</i>     | No                                                                 | <i>Wide</i>  |
| <b>Traumatic keratitis</b>                  | C4518708 | 733313008 | Keratitis due to trauma                | <b>Equal</b>  | H16.8             | <i>Other keratitis</i>                                                               | <i>Wide</i>  | 9A72              | Traumatic keratitis                                                       | <b>Equal</b>    | No                                                                 | <b>Equal</b> |
| <b>Traumatic macular hole</b>               | C4544116 | 735922000 | Traumatic macular hole                 | <b>Equal</b>  | H35.34            | <i>Macular cyst, hole, or pseudohole</i>                                             | <i>Wide</i>  | NA06.60           | Traumatic macular hole                                                    | <b>Equal</b>    | No                                                                 | <b>Equal</b> |
| <b>Traumatic miosis</b>                     | N/A      | 302939004 | <i>Constricted pupil</i>               | <i>Wide</i>   | H57.03            | <i>Miosis</i>                                                                        | <i>Wide</i>  | LA11.62           | <i>Anomalies of pupillary function</i>                                    | <i>Wide</i>     | No                                                                 | <i>Wide</i>  |
| <b>Traumatic mydriasis</b>                  | C1321307 | 404649002 | Traumatic mydriasis                    | <b>Equal</b>  | H57.04            | <i>Mydriasis</i>                                                                     | <i>Wide</i>  | LA11.62           | <i>Anomalies of pupillary function</i>                                    | <i>Wide</i>     | No                                                                 | <i>Wide</i>  |
| <b>Traumatic optic neuropathy</b>           | C0161398 | 230515007 | Traumatic optic neuropathy             | <b>Equal</b>  | S04.01            | <i>Injury of optic nerve</i>                                                         | <i>Wide</i>  | 9C40.7            | Traumatic optic neuropathy                                                | <b>Equal</b>    | No                                                                 | <b>Equal</b> |
| <b>Traumatic retinal hemorrhage</b>         | C4543917 | 735661006 | Traumatic retinal hemorrhage           | <b>Equal</b>  | H35.6             | <i>Retinal hemorrhage</i>                                                            | <i>Wide</i>  | NA06.7            | Traumatic retinal hemorrhage                                              | <b>Equal</b>    | No                                                                 | <b>Equal</b> |
| <b>Traumatic retinoschisis</b>              | C0152439 | 44268007  | <i>Retinoschisis</i>                   | <i>Wide</i>   | H33.19            | <i>Other retinoschisis and retinal cysts</i>                                         | <i>Wide</i>  | 9B73.1            | <i>Retinoschisis</i>                                                      | <i>Wide</i>     | No                                                                 | <i>Wide</i>  |
| <b>Traumatic subconjunctival hemorrhage</b> | C2146027 | 78768009  | <i>Subconjunctival hemorrhage</i>      | <i>Wide</i>   | H11.3             | <i>Conjunctival hemorrhage</i>                                                       | <i>Wide</i>  | 9A61.5            | <i>Conjunctival or subconjunctival hemorrhage</i>                         | <i>Wide</i>     | No                                                                 | <i>Wide</i>  |
| <b>Traumatic subluxation of lens</b>        | C0339380 | 231978000 | Traumatic subluxation of lens          | <b>Equal</b>  | H27.11            | <i>Subluxation of lens</i>                                                           | <i>Wide</i>  | 9B11.1            | <i>Dislocation of lens</i>                                                | <i>Wide</i>     | No                                                                 | <i>Wide</i>  |
| <b>Valsalva retinopathy</b>                 | C0339489 | 232031001 | Valsalva retinopathy                   | <b>Equal</b>  | H35.60            | <i>Retinal hemorrhage, unspecified eye</i>                                           | <i>Wide</i>  | 9B71              | <i>Retinopathy</i>                                                        | <i>Wide</i>     | No                                                                 | <i>Wide</i>  |
| <b>Vitreoretinal tuft</b>                   | C1827164 | 424358006 | Vitreoretinal tuft                     | <b>Equal</b>  | H43.81            | <i>Vitreous degeneration</i>                                                         | <i>Wide</i>  | 9B81              | <i>Posterior vitreous detachment</i>                                      | <i>Wide</i>     | No                                                                 | <i>Wide</i>  |
| <b>Vitreous foreign body</b>                | C1394043 | 247093005 | Foreign vitreous contents              | <b>Equal</b>  | H44.759 / H44.659 | Retained (nonmagnetic/magnetic) (old) foreign body in vitreous body, unspecified eye | <b>Equal</b> | NA06.80 / NA06.81 | <i>Retained intraocular magnetic/nonmagnetic foreign body, unilateral</i> | <i>Subgroup</i> | Retained magnetic/nonmagnetic foreign body in vitreous, unilateral | <b>Equal</b> |
| <b>Vitreous hemorrhage</b>                  | C0042909 | 31341008  | Vitreous hemorrhage                    | <b>Equal</b>  | H43.1             | Vitreous hemorrhage                                                                  | <b>Equal</b> | 9B83              | Vitreous hemorrhage                                                       | <b>Equal</b>    | No                                                                 | <b>Equal</b> |
| <b>Vitreous traction</b>                    | C2013169 | 312901001 | <i>Vitreomacular traction syndrome</i> | <i>Narrow</i> | H43.82            | <i>Vitreomacular adhesion</i>                                                        | <i>Wide</i>  | NA06.Z            | <i>Injury of eye or orbit, unspecified</i>                                | <i>Wide</i>     | No                                                                 | <i>Wide</i>  |
| <b>Vossius ring</b>                         | C0271169 | 72180004  | Vossius ring                           | <b>Equal</b>  | H27               | <i>Other disorders of lens</i>                                                       | <i>Wide</i>  | 9B10.2Y           | <i>Other specified cataracts</i>                                          | <i>Wide</i>     | No                                                                 | <i>Wide</i>  |

|                                            |              |           |                                           |             |       |                                      |             |         |                                             |             |    |             |
|--------------------------------------------|--------------|-----------|-------------------------------------------|-------------|-------|--------------------------------------|-------------|---------|---------------------------------------------|-------------|----|-------------|
| <b>White-eyed<br/>blowout<br/>fracture</b> | C034777<br>5 | 263167007 | <i>Blow out<br/>fracture of<br/>orbit</i> | <i>Wide</i> | S02.3 | <i>Fracture of orbital<br/>floor</i> | <i>Wide</i> | NA02.2Y | <i>Other specified<br/>orbital fracture</i> | <i>Wide</i> | No | <i>Wide</i> |
|--------------------------------------------|--------------|-----------|-------------------------------------------|-------------|-------|--------------------------------------|-------------|---------|---------------------------------------------|-------------|----|-------------|

UMLS = Unified Medical Language System; SNOMED-CT = Systemized Nomenclature of Medicine Clinical Terms; ICD-10-CM=International Classification of Diseases, version 10 Clinical Modification; ICD-11=International Classification of Diseases, version 11

Table S2 includes all the ophthalmic trauma concepts found in the BCSC book and the codes in the different data sets.
