# Supplementary material for: Concept Coverage Analysis of Ophthalmic Infections and Trauma among the Standardized Medical Terminologies SNOMED-CT, ICD-10-CM, and ICD-11
Source: PubMed Central journal article supplement — Ophthalmol Sci. 2023 May 25;3(4):100337. doi: 10.1016/j.xops.2023.100337 (PMC10336190; doi:10.1016/j.xops.2023.100337), 2023-05-25
Supplement: mmc2.pdf [file mmc2.pdf]

**Table S3. Concepts and Codes of Ophthalmic Infection**

| Word                                                      | UMLS     | SNOMED Code | SNOMED Name                                               | SNOMED Match | ICD-10-CM Code | ICD-10-CM Name                                            | ICD-10 Match | ICD-11        | ICD-11 Name                                        | ICD-11 Match | ICD-11 subgroup name                                      | ICD-11 Match |
|-----------------------------------------------------------|----------|-------------|-----------------------------------------------------------|--------------|----------------|-----------------------------------------------------------|--------------|---------------|----------------------------------------------------|--------------|-----------------------------------------------------------|--------------|
| Acanthamoeba endophthalmitis                              | C3536667 | 711644007   | Acanthamoeba endophthalmitis                              | Equal        | H44.12         | Parasitic endophthalmitis, unspecified                    | Wide         | 9C21.Y        | Other specified endophthalmitis                    | Wide         | No                                                        | Wide         |
| Acanthamoeba keratitis                                    | C0000880 | 231896005   | Acanthamoeba keratitis                                    | Equal        | B60.13         | Keratoconjunctivitis due to acanthamoeba                  | Wide         | 1F50/9A60.1   | Keratoconjunctivitis due to acanthamoeba           | Subgroup     | Acanthamoeba keratitis                                    | Equal        |
| Acute blepharitis                                         | C0521728 | 95750004    | Acute blepharitis                                         | Equal        | H01.0          | Blepharitis                                               | Wide         | 9A02.01       | Posterior blepharitis                              | Narrow       | No                                                        | Narrow       |
| Acute conjunctivitis                                      | C0155141 | 53726008    | Acute conjunctivitis                                      | Equal        | H10.2          | Other acute conjunctivitis                                | Equal        | 9A60.Z        | Conjunctivitis, unspecified                        | Subgroup     | Acute conjunctivitis                                      | Equal        |
| Acute cyclitis                                            | C1455748 | 42492000    | Acute cyclitis                                            | Equal        | H30.2          | Posterior cyclitis                                        | Narrow       | 9A96.Y        | Other specified anterior uveitis                   | Subgroup     | Cyclitis acute, recurrent or subacute                     | Equal        |
| Acute endophthalmitis                                     | C0154773 | 1493002     | Acute endophthalmitis                                     | Equal        | H44.009        | Acute and subacute endophthalmitis                        | Narrow       | 9C20.2        | Purulent endophthalmitis                           | Subgroup     | Acute endophthalmitis                                     | Equal        |
| Acute hemorrhagic conjunctivitis                          | C0009765 | 398264003   | Acute hemorrhagic conjunctivitis                          | Equal        | B30.3          | Acute epidemic hemorrhagic conjunctivitis (enteroviral)   | Equal        | 1D84.1        | Acute epidemic hemorrhagic conjunctivitis          | Equal        | No                                                        | Equal        |
| Acute iridocyclitis                                       | C1455749 | 77971008    | Iridocyclitis                                             | Wide         | H20.0          | Acute and subacute iridocyclitis                          | Wide         | 9A96.Y        | Other specified anterior uveitis                   | Subgroup     | Acute iridocyclitis                                       | Equal        |
| Acute iritis                                              | C0271105 | 2905005     | Acute iritis                                              | Equal        | H20.0          | Acute and subacute iridocyclitis                          | Wide         | 9A96.Y        | Other specified anterior uveitis                   | Subgroup     | Acute iritis, recurrent or subacute                       | Equal        |
| Acute posterior multifocal placoid pigment epitheliopathy | C0154884 | 89188001    | Acute posterior multifocal placoid pigment epitheliopathy | Equal        | H30.14         | Acute posterior multifocal placoid pigment epitheliopathy | Equal        | 9B65.0        | Noninfectious posterior choroiditis                | Subgroup     | Acute posterior multifocal placoid pigment epitheliopathy | Equal        |
| Acute retinal necrosis                                    | C0035319 | 231986000   | Acute retinal necrosis                                    | Equal        | H30            | Chorioretinal inflammation                                | Wide         | 9B65.1        | Infectious posterior choroiditis                   | Subgroup     | Acute retinal necrosis                                    | Equal        |
| Acute retrobulbar neuritis                                | C0155301 | 51604006    | Acute retrobulbar neuritis                                | Equal        | H46.1          | Retrobulbar neuritis                                      | Wide         | 9C40.10       | Retrobulbar neuritis                               | Wide         | No                                                        | Wide         |
| Acute toxoplasmosis chorioretinitis                       | C1281937 | 214031009   | Acute toxoplasmosis chorioretinitis                       | Equal        | B58.01         | Toxoplasma chorioretinitis                                | Wide         | 1F57.3/9B65.2 | Toxoplasma chorioretinitis                         | Wide         | No                                                        | Wide         |
| Adenoviral keratitis                                      | C1282239 | 314559002   | Adenoviral keratitis                                      | Equal        | B30.0          | Keratoconjunctivitis due to adenovirus                    | Narrow       | 9A71          | Infectious keratitis                               | Wide         | No                                                        | Wide         |
| Anterior uveitis                                          | C0052165 | 410692006   | Anterior uveitis                                          | Equal        | H20            | Iridocyclitis                                             | Wide         | 9A96          | Anterior uveitis                                   | Equal        | No                                                        | Equal        |
| Areolar keratitis                                         | C0271260 | 50998005    | Areolar keratitis                                         | Equal        | H16.11         | Macular keratitis                                         | Equal        | 9A78.Z        | Certain specified disorders of cornea, unspecified | Subgroup     | Areolar keratitis                                         | Equal        |
| Ascaris lumbricoides endophthalmitis                      | C5395921 | 860836003   | Endophthalmitis caused by ascaris lumbricoides            | Equal        | H44.12         | Parasitic endophthalmitis                                 | Wide         | 9C21.Y        | Other specified endophthalmitis                    | Wide         | No                                                        | Wide         |
| Aspergillus endophthalmitis                               | C1531605 | 413583003   | Aspergillus endophthalmitis                               | Equal        | H44.1          | Other endophthalmitis                                     | Wide         | 1F20.OY       | Invasive aspergillosis of other specified site     | Subgroup     | Aspergillus endophthalmitis                               | Equal        |

|                                 |          |                   |                                           |        |                 |                                                         |        |         |                                                     |          |                                            |        |
|---------------------------------|----------|-------------------|-------------------------------------------|--------|-----------------|---------------------------------------------------------|--------|---------|-----------------------------------------------------|----------|--------------------------------------------|--------|
| Aspergillus keratitis           | N/A      | 314558005         | Fungal keratitis                          | Wide   | H16.8           | Other Keratitis                                         | Wide   | 1F20.0Y | Invasive aspergillosis of other specified site      | Subgroup | Aspergillus keratitis                      | Equal  |
| Atrophic iris                   | C0423319 | 95709007          | Atrophic iris                             | Equal  | H21.269         | Iris atrophy (essential) (progressive), unspecified eye | Equal  | 9A90.2  | Iris atrophy                                        | Equal    | No                                         | Equal  |
| Bacterial chorioretinitis       | C0339409 | 231988004         | Bacterial chorioretinitis                 | Equal  | H30             | Chorioretinal inflammation                              | Wide   | 9B65.2  | Chorioretinal inflammation                          | Wide     | No                                         | Wide   |
| Bacterial conjunctivitis        | C0009763 | 12835005          | Bacterial conjunctivitis                  | Equal  | H10.0           | Mucopurulent conjunctivitis                             | Wide   | 9A60.Y  | Other specified conjunctivitis                      | Subgroup | Bacterial conjunctivitis                   | Equal  |
| Bacterial endophthalmitis       | C1531510 | 413626002         | Bacterial endophthalmitis                 | Equal  | H44.1           | Other endophthalmitis                                   | Wide   | 9B72.Y  | Other specified inflammatory disease of the retina  | Subgroup | Bacterial endophthalmitis                  | Equal  |
| Bacterial keratitis             | C0854211 | 314557000         | Bacterial keratitis                       | Equal  | H16             | Keratitis                                               | Wide   | 9A71    | Infectious keratitis                                | Subgroup | Bacterial keratitis                        | Equal  |
| Bacterial panuveitis            | C5559685 | 789116000         | Infectious panuveitis                     | Wide   | H44.11          | Panuveitis                                              | Wide   | 9C20.1  | Infectious panuveitis                               | Subgroup | Other bacterial panuveitis                 | Equal  |
| Bacterial retinitis             | C5559980 | 399463004         | Retinitis                                 | Wide   | H30             | Chorioretinal inflammation                              | Wide   | 9B72.Z  | Inflammatory diseases of the retina, unspecified    | Wide     | No                                         | Wide   |
| Blepharitis                     | C0005741 | 41446000          | Blepharitis                               | Equal  | H01.0           | Blepharitis                                             | Equal  | 9A01.3  | Infectious blepharitis                              | Narrow   | No                                         | Narrow |
| Blepharoconjunctivitis          | C0005743 | 686859002         | Blepharoconjunctivitis                    | Equal  | H10.5           | Blepharoconjunctivitis                                  | Equal  | 9A60.4  | Blepharoconjunctivitis                              | Equal    | No                                         | Equal  |
| Borrelia burgdorferi panuveitis | C5396742 | 870335005         | Panuveitis caused by Borrelia burgdorferi | Equal  | H44.11          | Panuveitis                                              | Wide   | 9C20.Y  | Other specified panuveitis                          | Wide     | No                                         | Wide   |
| Brawny scleritis                | C0155356 | 91612009          | Brawny scleritis                          | Equal  | H15.02          | Brawny scleritis                                        | Equal  | 9B51    | Brawny scleritis                                    | Equal    | No                                         | Equal  |
| Brucellosis uveitis             | C1531621 | 413716003         | Brucellosis uveitis                       | Equal  | A23.8           | Other brucellosis                                       | Wide   | 9C20    | Panuveitis                                          | Wide     | No                                         | Wide   |
| Canaliculitis                   | C0423172 | 84399007/26479009 | Acute/Chronic lacrimal canaliculitis      | Narrow | H04.33 / H04.42 | Acute/Chronic lacrimal canaliculitis                    | Narrow | 9A11.1  | Canaliculitis                                       | Equal    | No                                         | Equal  |
| Candida dacryolith              | N/A      | 47952001          | Dacryolith                                | Wide   | H04.51          | Dacryolith                                              | Wide   | 9A11.6  | Dacryolith                                          | Wide     | No                                         | Wide   |
| Candida endophthalmitis         | C1167769 | 413746000         | Candida endophthalmitis                   | Equal  | H44.1           | Other endophthalmitis                                   | Wide   | 9B72.Y  | Other specified inflammatory diseases of the retina | Subgroup | Endogenous fungal endophthalmitis, candida | Equal  |
| Candida retinitis               | C0339412 | 231990003         | Candida retinitis                         | Equal  | H30             | Chorioretinal inflammation                              | Wide   | 9B72.Z  | Inflammatory diseases of the retina, unspecified    | Wide     | No                                         | Wide   |
| Chalazion                       | C0007933 | 1482004           | Chalazion                                 | Equal  | H00.1           | Chalazion                                               | Equal  | 9A02.0  | Chalazion                                           | Equal    | No                                         | Equal  |
| Chikungunya retinitis           | N/A      | 399463004         | Retinitis                                 | Wide   | H30             | Chorioretinal inflammation                              | Wide   | 9B72.Z  | Inflammatory diseases of the retina, unspecified    | Wide     | No                                         | Wide   |
| Chlamydia conjunctivitis        | C1393756 | 231861005         | Chlamydial conjunctivitis                 | Equal  | A74.0           | Chlamydial conjunctivitis                               | Equal  | 1C20    | Chlamydial conjunctivitis                           | Equal    | No                                         | Equal  |
| Chorioretinal scar              | C0008512 | 53854005          | Chorioretinal scar                        | Equal  | H31.0           | Chorioretinal scars                                     | Equal  | 9B62    | Chorioretinal scars                                 | Equal    | No                                         | Equal  |

|                                              |          |           |                                               |        |         |                                            |        |               |                                                                           |          |                                                 |        |
|----------------------------------------------|----------|-----------|-----------------------------------------------|--------|---------|--------------------------------------------|--------|---------------|---------------------------------------------------------------------------|----------|-------------------------------------------------|--------|
| Chorioretinitis                              | C0008513 | 46627006  | Chorioretinitis                               | Equal  | H30     | Chorioretinal inflammation                 | Equal  | 9B65.2        | Chorioretinal inflammation                                                | Equal    | No                                              | Equal  |
| Chorioretinitis with coccidiomycosis         | C1562346 | 417405005 | Chorioretinitis with coccidiomycosis          | Equal  | H30     | Chorioretinal inflammation                 | Wide   | 9B65.2        | Chorioretinal inflammation                                                | Wide     | No                                              | Wide   |
| Choroiditis                                  | C008526  | 16553002  | Choroiditis                                   | Equal  | H30     | Chorioretinal inflammation                 | Wide   | 9B65          | Choroiditis                                                               | Equal    | No                                              | Equal  |
| Chronic blepharitis                          | C0521729 | 95751000  | Chronic blepharitis                           | Equal  | H01.0   | Blepharitis                                | Wide   | 9A02.1        | Posterior blepharitis                                                     | Narrow   | No                                              | Narrow |
| Chronic conjunctivitis                       | C0155145 | 73762008  | Chronic conjunctivitis                        | Equal  | H10.4   | Chronic conjunctivitis                     | Equal  | 9A60.Z        | Conjunctivitis, unspecified                                               | Subgroup | Chronic conjunctivitis                          | Equal  |
| Chronic endophthalmitis                      | C0154774 | 13978000  | Chronic endophthalmitis                       | Equal  | H44.1   | Other endophthalmitis                      | Wide   | 9B72.Y        | Other specified inflammatory diseases of the retina                       | Subgroup | Chronic postoperative bacterial endophthalmitis | Equal  |
| Chronic iridocyclitis                        | C1510449 | 193493000 | Chronic iridocyclitis due to another disorder | Narrow | H20.1   | Chronic iridocyclitis                      | Equal  | 9A96.Y        | Other specified anterior uveitis                                          | Subgroup | Chronic iridocyclitis, unspecified              | Equal  |
| Cicatrizating conjunctivitis                 | C1274790 | 403436006 | Cicatrizating conjunctivitis                  | Equal  | H10     | Conjunctivitis                             | Wide   | 9A60.2        | Cicatrizating conjunctivitis                                              | Equal    | No                                              | Equal  |
| Congenital syphilitic chorioretinitis        | C2887119 | 9941009   | Congenital syphilitic chorioiditis            | Narrow | A50.32  | Late congenital syphilitic chorioretinitis | Narrow | 1A60.0/9B65.2 | Congenital syphilitic chorioretinitis                                     | Equal    | No                                              | Equal  |
| Conjunctival abscess                         | C0239086 | 95746006  | Abscess of conjunctiva                        | Equal  | H11     | Other disorder of conjunctiva              | Wide   | 9A60.31       | Abscess of conjunctiva                                                    | Equal    | No                                              | Equal  |
| Conjunctivitis                               | C0009763 | 9826008   | Conjunctivitis                                | Equal  | H10     | Conjunctivitis                             | Equal  | 9A60          | Conjunctivitis                                                            | Equal    | No                                              | Equal  |
| Conjunctivitis due to acquired toxoplasmosis | C0153307 | 67372006  | Conjunctivitis due to acquired toxoplasmosis  | Equal  | H10     | Conjunctivitis                             | Wide   | 1F57.3        | Eye disease due to Toxoplasma gondii                                      | Wide     | No                                              | Wide   |
| Conjunctivitis due to adenovirus             | C0600124 | 186679007 | Conjunctivitis due to adenovirus              | Equal  | B30.1   | Conjunctivitis due to adenovirus           | Equal  | 1D84.0        | Conjunctivitis due to adenovirus                                          | Equal    | No                                              | Equal  |
| Corneal transplant infection                 | C2891298 | 314553001 | Cornea graft infection                        | Equal  | T86.842 | Corneal transplant infection               | Equal  | NE83.1        | Infection arising from device, implant or graft, not elsewhere classified | Wide     | No                                              | Wide   |
| Corneal ulcer                                | C0010043 | 91514001  | Corneal ulcer                                 | Equal  | H16.0   | Corneal ulcer                              | Equal  | 9A76          | Corneal ulcer                                                             | Equal    | No                                              | Equal  |
| Cryptococcal chorioretinitis                 | C1562194 | 416877003 | Cryptococcal chorioretinitis                  | Equal  | H30     | Chorioretinal inflammation                 | Wide   | 9B65.2        | Chorioretinal inflammation                                                | Wide     | No                                              | Wide   |
| Cryptococcal choroiditis                     | C1562082 | 417344003 | Cryptococcal choroiditis                      | Equal  | H30     | Chorioretinal inflammation                 | Wide   | 9B65.1        | Infectious posterior choroiditis                                          | Wide     | No                                              | Wide   |
| Cryptococcal endophthalmitis                 | C1562278 | 416296007 | Cryptococcal endophthalmitis                  | Equal  | H44.1   | Other endophthalmitis                      | Wide   | 9C21          | Endophthalmitis                                                           | Wide     | No                                              | Wide   |
| Cryptococcal retinitis                       | C1562210 | 417547006 | Cryptococcal retinitis                        | Equal  | H30     | Chorioretinal inflammation                 | Wide   | 9B72.Z        | Inflammatory diseases of the retina, unspecified                          | Wide     | No                                              | Wide   |
| Cyclitis                                     | C0010543 | 17657000  | Cyclitis                                      | Equal  | H30.2   | Posterior cyclitis                         | Narrow | 9A96.Z        | Anterior uveitis, unspecified                                             | Subgroup | Cyclitis                                        | Equal  |
| Cysticercosis of eye                         | C0348996 | 187149005 | Cysticercosis of eye                          | Equal  | B69.1   | Cysticercosis of eye                       | Equal  | 1F70.1        | Cysticercosis of eye                                                      | Equal    | No                                              | Equal  |
| Cytomegalovirus chorioretinitis              | C0877072 | 711616006 | Cytomegalovirus chorioretinitis               | Equal  | H30     | Chorioretinal inflammation                 | Wide   | 9B72.00       | Cytomegaloviral retinitis                                                 | Narrow   | No                                              | Narrow |

|                                            |          |            |                                                |       |         |                                                                 |        |          |                                                  |          |                                            |       |
|--------------------------------------------|----------|------------|------------------------------------------------|-------|---------|-----------------------------------------------------------------|--------|----------|--------------------------------------------------|----------|--------------------------------------------|-------|
| Cytomegalovirus keratitis                  | N/A      | 314020001  | Viral keratitis                                | Wide  | H16.8   | Other keratitis                                                 | Wide   | 9A71     | Infectious keratitis                             | Wide     | No                                         | Wide  |
| Cytomegalovirus retinitis                  | C0206178 | 22455005   | Cytomegaloviral retinitis                      | Equal | H30     | Chorioretinal inflammation                                      | Wide   | 9B72.00  | Cytomegaloviral retinitis                        | Equal    | No                                         | Equal |
| Cytomegalovirus uveitis                    | N/A      | 128473001  | Uveitis                                        | Wide  | H20     | Iridocyclitis                                                   | Wide   | 9A96     | Anterior uveitis                                 | Wide     | No                                         | Wide  |
| Dacryoadenitis                             | C0155223 | 86927009   | Dacryoadenitis                                 | Equal | H04.0   | Dacryoadenitis                                                  | Equal  | 9A10.Y   | Other specified disorders of the lacrimal gland  | Wide     | No                                         | Wide  |
| Dacryocystitis                             | C0010930 | 85777005   | Dacryocystitis                                 | Equal | H04.30  | Unspecified dacryocystitis                                      | Wide   | 9A11.2   | Dacryocystitis                                   | Equal    | No                                         | Equal |
| Dacryolith                                 | C0155249 | 47952001   | Dacryolith                                     | Equal | H04.51  | Dacryolith                                                      | Equal  | 9A11.6   | Dacryolith                                       | Equal    | No                                         | Equal |
| Deep scleritis                             | C0521768 | 95796007   | Deep scleritis                                 | Equal | H15.03  | Posterior scleritis                                             | Narrow | 9B51     | Scleritis                                        | Wide     | No                                         | Wide  |
| Dendritic keratitis                        | C0022570 | 29943008   | Herpes simplex dendritic keratitis             | Equal | B00.52  | Herpesviral keratitis                                           | Wide   | 1F100.10 | Herpes simplex keratitis                         | Subgroup | Dendritic keratitis                        | Equal |
| Dermatoblepharitis                         | N/A      | 41446000   | Blepharitis                                    | Equal | H01.0   | Blepharitis                                                     | Equal  | 9A01.3   | Infectious blepharitis                           | Wide     | No                                         | Wide  |
| Diffuse chorioretinal lesion               | C0423446 | 247194002  | Diffuse chorioretinal lesion                   | Equal | H30.133 | Disseminated chorioretinal inflammation, generalized, bilateral | Narrow | 9B7Z     | Disorders of the retina, unspecified             | Wide     | No                                         | Wide  |
| Diffuse episcleritis                       | C1282232 | 314549003  | Diffuse episcleritis                           | Equal | H15.1   | Episcleritis                                                    | Wide   | 9B50     | Episcleritis                                     | Wide     | No                                         | Wide  |
| Diffuse unilateral subacute neuroretinitis | C0339404 | 1119281000 | Diffuse unilateral subacute neuroretinitis     | Equal | H30     | Chorioretinal inflammation                                      | Wide   | 9B65.0   | Noninfectious posterior choroiditis              | Subgroup | Diffuse unilateral subacute neuroretinitis | Equal |
| Disciform keratitis                        | C0339235 | 231907006  | Disciform keratitis                            | Equal | B00.52  | Herpesviral keratitis                                           | Wide   | 1F100.10 | Herpes simplex keratitis                         | Subgroup | Disciform keratitis                        | Equal |
| Disseminated choroiditis                   | C0271027 | 27339005   | Disseminated choroiditis                       | Equal | H30.139 | Disseminated chorioretinal inflammation, generalized, bilateral | Narrow | 9B65     | Choroiditis                                      | Wide     | No                                         | Wide  |
| Eales Disease                              | C0271073 | 54122009   | Eales' disease                                 | Equal | H35.06  | Eales' disease                                                  | Equal  | 9B77     | Eales disease                                    | Equal    | No                                         | Equal |
| Ebola virus panuveitis                     | N/A      | 789116000  | Infectious panuveitis                          | Wide  | H44.11  | Panuveitis                                                      | Wide   | 9C20     | Panuveitis                                       | Wide     | No                                         | Wide  |
| Endophthalmitis                            | C0014236 | 1847009    | Endophthalmitis                                | Equal | H44.0   | Purulent endophthalmitis                                        | Narrow | 9C21     | Endophthalmitis                                  | Equal    | No                                         | Equal |
| Episcleritis                               | C0014583 | 815008     | Episcleritis                                   | Equal | H15.1   | Episcleritis                                                    | Equal  | 9B50     | Episcleritis                                     | Equal    | No                                         | Equal |
| Epstein-Barr virus conjunctivitis          | N/A      | 9826008    | Conjunctivitis                                 | Wide  | H10.89  | Other Conjunctivitis                                            | Wide   | 9A60     | Conjunctivitis                                   | Wide     | No                                         | Wide  |
| Epstein-Barr virus dacryoadenitis          | C5767335 | 840443008  | Dacryoadenitis due to infectious mononucleosis | Equal | H04.0   | Dacryoadenitis                                                  | Wide   | 9A10.0   | Infections of the lacrimal gland                 | Wide     | No                                         | Wide  |
| Epstein-Barr virus infection of the retina | C1562149 | 416195002  | Epstein-Barr virus infection of the retina     | Equal | H30     | Chorioretinal inflammation                                      | Wide   | 9B72.Z   | Inflammatory diseases of the retina, unspecified | Wide     | No                                         | Wide  |
| Epstein-Barr virus keratitis               | N/A      | 5888003    | Keratitis                                      | Wide  | H16.8   | Other keratitis                                                 | Wide   | 9A71     | Infectious keratitis                             | Wide     | No                                         | Wide  |

|                                |           |           |                                |       |                 |                                                                           |        |         |                                                        |          |                             |       |
|--------------------------------|-----------|-----------|--------------------------------|-------|-----------------|---------------------------------------------------------------------------|--------|---------|--------------------------------------------------------|----------|-----------------------------|-------|
| External hordeolum             | C0085690  | 1489008   | External hordeolum             | Equal | H00.01          | Hordeolum externum                                                        | Equal  | 9A01.21 | Hordeolum externum                                     | Equal    | No                          | Equal |
| Filamentary keratitis          | C0155077  | 51286002  | Filamentary keratitis          | Equal | H16.129         | Filamentary keratitis, unspecified eye                                    | Equal  | 9A78.Z  | Certain specified disorders of the cornea, unspecified | Subgroup | Filamentary keratitis       | Equal |
| Flat chorioretinal lesion      | C0423443  | 247191005 | Flat chorioretinal lesion      | Equal | H30             | Chorioretinal inflammation                                                | Wide   | 9B65.2  | Chorioretinal inflammation                             | Wide     | No                          | Wide  |
| Focal chorioretinal lesion     | C0423440  | 247188005 | Focal chorioretinal lesion     | Equal | H30             | Chorioretinal inflammation                                                | Wide   | 9B65.2  | Chorioretinal inflammation                             | Wide     | No                          | Wide  |
| Focal retinitis                | C0271025  | 359668007 | Focal retinitis                | Equal | H30.049         | Focal chorioretinal inflammation, macular or paramacular, unspecified eye | Narrow | 9B72.Z  | Inflammatory diseases of the retina, unspecified       | Wide     | No                          | Wide  |
| Follicular conjunctivitis      | C0221384  | 86402005  | Follicular conjunctivitis      | Equal | H10.01 / H10.43 | Acute/chronic follicular conjunctivitis                                   | Equal  | 9A60.1  | Follicular conjunctivitis                              | Equal    | No                          | Equal |
| Fovealitis                     | N/A       | 399463004 | Retinitis                      | Wide  | H30             | Chorioretinal inflammation                                                | Wide   | 9B72.Z  | Inflammatory diseases of the retina, unspecified       | Wide     | No                          | Wide  |
| Frosted branch angiitis        | C1532529  | 414297000 | Frosted branch angiitis        | Equal | H30             | Chorioretinal inflammation                                                | Wide   | 9B72.00 | Cytomegaloviral retinitis                              | Wide     | No                          | Wide  |
| Fungal choroiditis             | C0339411  | 359702001 | Fungal choroiditis             | Equal | H30             | Chorioretinal inflammation                                                | Wide   | 9B65    | Choroiditis                                            | Wide     | No                          | Wide  |
| Fungal conjunctivitis          | C0339170  | 231862003 | Fungal conjunctivitis          | Equal | H10.8           | Other conjunctivitis                                                      | Wide   | 9A60.Y  | Other specified conjunctivitis                         | Wide     | No                          | Wide  |
| Fungal endophthalmitis         | C1532533  | 414303007 | Fungal endophthalmitis         | Equal | H44.1           | Other endophthalmitis                                                     | Wide   | 9B72.Y  | Other specified inflammatory diseases of the retina    | Subgroup | Fungal endophthalmitis      | Equal |
| Fungal keratitis               | C1262117  | 314558005 | Fungal keratitis               | Equal | H16.8           | Other keratitis                                                           | Wide   | 9A71    | Infectious keratitis                                   | Subgroup | Fungal keratitis            | Equal |
| Fungal orbital cellulitis      | N/A       | 194005002 | Orbital cellulitis             | Wide  | H05.01          | Cellulitis of orbit                                                       | Wide   | 9A21.0  | Orbital cellulitis                                     | Wide     | No                          | Wide  |
| Fungal panuveitis              | C5567920  | 75614007  | Panuveitis                     | Wide  | H44.11          | Panuveitis                                                                | Wide   | 9C20    | Panuveitis                                             | Subgroup | Other fungal panuveitis     | Equal |
| Fungal retinitis               | C23663910 | 399463004 | Retinitis                      | Wide  | H30             | Chorioretinal inflammation                                                | Wide   | 9B72.Z  | Inflammatory diseases of the retina, unspecified       | Wide     | No                          | Wide  |
| Giant papillary conjunctivitis | C0009769  | 231857004 | Giant papillary conjunctivitis | Equal | H10.41          | Chronic giant papillary conjunctivitis                                    | Narrow | 9A60.00 | Giant papillary conjunctivitis                         | Equal    | No                          | Equal |
| Gonococcal conjunctivitis      | C4304446  | 231858009 | Gonococcal conjunctivitis      | Equal | A54.31          | Gonococcal conjunctivitis                                                 | Equal  | 1A72.4  | Gonococcal infection of the eye                        | Subgroup | Gonococcal conjunctivitis   | Equal |
| Gonococcal endophthalmitis     | C0153213  | 111807001 | Gonococcal endophthalmitis     | Equal | A54.3           | Gonococcal infection of eye                                               | Wide   | 1A72.4  | Gonococcal infection of eye                            | Wide     | No                          | Wide  |
| Gonococcal iridocyclitis       | C0153212  | 9091006   | Gonococcal iridocyclitis       | Equal | A54.32          | Gonococcal iridocyclitis                                                  | Equal  | 1A72.4  | Gonococcal infection of eye                            | Subgroup | Gonococcal iridocyclitis    | Equal |
| Gonococcal keratitis           | C0153214  | 40149008  | Gonococcal keratitis           | Equal | A54.33          | Gonococcal keratitis                                                      | Equal  | 1A72.4  | Gonococcal infection of eye                            | Subgroup | Gonococcal keratitis        | Equal |
| Gonococcal uveitis             | N/A       | 410477000 | Infective uveitis              | Wide  | A54.3           | Gonococcal infection of eye                                               | Wide   | 1A72.4  | Gonococcal infection of eye                            | Subgroup | Gonococcal anterior uveitis | Equal |

|                                              |          |             |                                              |        |             |                                   |        |                            |                                    |          |                                |        |
|----------------------------------------------|----------|-------------|----------------------------------------------|--------|-------------|-----------------------------------|--------|----------------------------|------------------------------------|----------|--------------------------------|--------|
| Granular conjunctivitis                      | C1393763 | 9006000     | Trachomatous granular conjunctivitis         | Narrow | H10         | Conjunctivitis                    | Wide   | 1C23.1                     | Active stage of trachoma           | Subgroup | Granular conjunctivitis        | Equal  |
| Granulomatous chorioretinitis                | C0521679 | 95682009    | Granulomatous chorioretinitis                | Equal  | H30         | Chorioretinal inflammation        | Wide   | 1B12.1                     | Tuberculosis of the eye            | Wide     | No                             | Wide   |
| Granulomatous choroiditis                    | C0521680 | 95683004    | Granulomatous choroiditis                    | Equal  | H30         | Chorioretinal inflammation        | Wide   | 9B65                       | Choroiditis                        | Wide     | No                             | Wide   |
| Granulomatous conjunctivitis                 | C0521726 | 95748007    | Granulomatous conjunctivitis                 | Equal  | H11.2<br>23 | Conjunctival granuloma, bilateral | Narrow | 9A60                       | Conjunctivitis                     | Wide     | No                             | Wide   |
| Granulomatous keratitis                      | C0521718 | 95734007    | Granulomatous keratitis                      | Equal  | H16.8       | Other keratitis                   | Wide   | 9A71                       | Infectious keratitis               | Wide     | No                             | Wide   |
| Herpes simplex conjunctivitis                | C1096627 | 410508006   | Herpes simplex conjunctivitis                | Equal  | B00.5<br>3  | Herpesviral conjunctivitis        | Wide   | 1D84.Y&XA8PS3              | Herpes simplex conjunctivitis      | Equal    | No                             | Equal  |
| Herpes simplex disciform keratitis           | C0153038 | 59523007    | Herpes simplex disciform keratitis           | Equal  | B00.5<br>2  | Herpesviral keratitis             | Wide   | 1F100.1                    | Herpes simplex keratitis           | Equal    | No                             | Equal  |
| Herpes simplex eyelid dermatitis             | C0153037 | 186544000   | Herpes simplex eyelid dermatitis             | Equal  | B00.5<br>9  | Other herpesviral disease of eye  | Wide   | 1F100.11                   | Herpes simplex infection of eyelid | Equal    | No                             | Equal  |
| Herpes simplex iridocyclitis                 | C0153039 | 13608004    | Herpes simplex iridocyclitis                 | Equal  | B00.5<br>1  | Herpesviral iridocyclitis         | Wide   | 1F100.1Y/9A96.2&<br>XA03X9 | Herpesviral iridocyclitis          | Wide     | No                             | Wide   |
| Herpes simplex keratouveitis                 | C1275686 | 397572000   | Herpes simplex keratouveitis                 | Equal  | B00.5<br>9  | Other herpesviral disease of eye  | Wide   | 1F100.1Y/9A96.2            | Herpes simplex anterior uveitis    | Wide     | No                             | Wide   |
| Herpes simplex necrotizing stromal keratitis | C1301534 | 397571007   | Herpes simplex necrotizing stromal keratitis | Equal  | H16.8       | Other keratitis                   | Wide   | 1F100.10                   | Herpes simplex keratitis           | Wide     | No                             | Wide   |
| Herpes simplex retinitis                     | C5567343 | 186542001   | Ophthalmic herpes simplex                    | Wide   | B00.5<br>9  | Other herpesviral disease of eye  | Wide   | 1F00.1                     | Herpes simplex infection of eye    | Wide     | No                             | Wide   |
| Herpes simplex stromal keratitis             | C1301533 | 397570008   | Herpes simplex stromal keratitis             | Equal  | B00.5<br>9  | Other herpesviral disease of eye  | Wide   | 1F100.10                   | Herpes simplex keratitis           | Wide     | No                             | Wide   |
| Herpes simplex uveitis                       | N/A      | 186542001   | Ophthalmic herpes simplex                    | Wide   | B00.5<br>9  | Other herpesviral disease of eye  | Wide   | 1F00.1/9A96.2              | Herpes simplex anterior uveitis    | Narrow   | No                             | Narrow |
| Herpes simplex virus epithelial keratitis    | C1561991 | 417091001   | Herpes simplex virus epithelial keratitis    | Equal  | B00.5<br>2  | Herpesviral keratitis             | Wide   | 1F100.10                   | Herpes simplex keratitis           | Wide     | No                             | Wide   |
| Herpes zoster acute retinal necrosis         | C1827297 | 422471006   | Herpes zoster acute retinal necrosis         | Equal  | B02.3<br>9  | Other herpes zoster eye disease   | Wide   | 1E91.1                     | Ophthalmic zoster                  | Wide     | No                             | Wide   |
| Herpes zoster anterior uveitis               | N/A      | 410692006   | Anterior uveitis                             | Wide   | B02.3<br>9  | Other herpes zoster eye disease   | Wide   | 1E91.1/9A96.2              | Zoster anterior uveitis            | Equal    | No                             | Equal  |
| Herpes zoster interstitial keratitis         | C1959857 | 426570007   | Herpes zoster interstitial keratitis         | Equal  | B02.3<br>9  | Other herpes zoster eye disease   | Wide   | 1E91.1                     | Ophthalmic zoster                  | Wide     | No                             | Wide   |
| Herpes zoster iridocyclitis                  | C0153028 | 10698009    | Herpes zoster iridocyclitis                  | Equal  | B02.3<br>2  | Zoster iridocyclitis              | Equal  | 1E91.1/9A96.2              | Zoster anterior uveitis            | Equal    | No                             | Equal  |
| Herpes zoster keratitis                      | C1275687 | 397573005   | Herpes zoster keratitis                      | Equal  | B02.3<br>3  | Zoster keratitis                  | Equal  | 1E91.1                     | Ophthalmic zoster                  | Subgroup | Herpes zoster keratitis        | Equal  |
| Herpes zoster retinitis                      | C0748380 | 421029004   | Herpes zoster retinitis                      | Equal  | B02.3<br>9  | Other herpes zoster eye disease   | Wide   | 1E91.1                     | Ophthalmic zoster                  | Wide     | No                             | Wide   |
| Herpes zoster scleritis                      | C3509198 | 1.08713E+15 | Herpes zoster scleritis                      | Equal  | B02.3<br>4  | Zoster scleritis                  | Equal  | 1E91.1/9B51                | Zoster scleritis                   | Equal    | No                             | Equal  |
| Herpesvirus panuveitis                       | C5396739 | 870332008   | Panuveitis caused by Herpesvirus             | Equal  | H44.1<br>1  | Panuveitis                        | Wide   | 9C20.1                     | Infectious panuveitis              | Subgroup | Herpesvirus related panuveitis | Equal  |
| Herpetic iridocyclitis                       | C1719768 | 420485005   | Herpetic iridocyclitis                       | Equal  | B00.5<br>1  | Herpesviral iridocyclitis         | Equal  | 1F100.1Y/9A96.2&<br>XA03X9 | Herpesviral iridocyclitis          | Equal    | No                             | Equal  |

|                                          |           |           |                                         |        |        |                                               |       |         |                                                               |          |                                 |        |
|------------------------------------------|-----------|-----------|-----------------------------------------|--------|--------|-----------------------------------------------|-------|---------|---------------------------------------------------------------|----------|---------------------------------|--------|
| Herpetic keratitis                       | C0019357  | 9389005   | <i>Herpes simplex keratitis</i>         | Narrow | B00.52 | Herpesviral keratitis                         | Equal | 1F100.1 | Herpes simplex keratitis                                      | Subgroup | Herpetic keratitis              | Equal  |
| Histoplasma capsulatum retinitis         | C0153264  | 187039009 | Histoplasma capsulatum with retinitis   | Equal  | B39.3  | <i>Disseminated histoplasmosis capsulatii</i> | Wide  | 9B72.Z  | <i>Inflammatory diseases of the retina, unspecified</i>       | Wide     | No                              | Wide   |
| Histoplasma duboisii retinitis           | C0153272  | 187049007 | Histoplasma duboisii with retinitis     | Equal  | H30    | <i>Chorioretinal inflammation</i>             | Wide  | 9B72.Z  | <i>Inflammatory diseases of the retina, unspecified</i>       | Wide     | No                              | Wide   |
| Histoplasmosis retinitis                 | C0153278  | 187058000 | Histoplasmosis with retinitis           | Equal  | H30    | <i>Chorioretinal inflammation</i>             | Wide  | 9B72.Z  | <i>Inflammatory diseases of the retina, unspecified</i>       | Wide     | No                              | Wide   |
| Hordeolum                                | C0019917  | 397513003 | Hordeolum                               | Equal  | H00.0  | Hordeolum of eyelid                           | Equal | 9A01.2  | Hordeolum                                                     | Equal    | No                              | Equal  |
| Human immunodeficiency virus retinitis   | C0744977  | 69154000  | <i>AIDS with background retinopathy</i> | Wide   | H35.00 | <i>Unspecified background retinopathy</i>     | Wide  | 9B72.01 | HIV retinitis                                                 | Equal    | No                              | Equal  |
| Human immunodeficiency virus retinopathy | C0276592  | 69154000  | <i>AIDS with background retinopathy</i> | Narrow | H35.00 | <i>Unspecified background retinopathy</i>     | Wide  | 9B72.01 | <i>HIV retinitis</i>                                          | Narrow   | No                              | Narrow |
| Hypopyon                                 | C0020641  | 87807004  | Hypopyon                                | Equal  | H20.05 | Hypopyon                                      | Equal | MC20.2  | Hypopyon                                                      | Equal    | No                              | Equal  |
| Hypopyon ulcer                           | C0155070  | 6395007   | Hypopyon ulcer                          | Equal  | H16.03 | Corneal ulcer with hypopyon                   | Equal | 9A76    | <i>Corneal ulcer</i>                                          | Subgroup | Hypopyon ulcer                  | Equal  |
| Infectious blepharitis                   | C0729587  | 312219000 | Infective blepharitis                   | Equal  | H01.00 | <i>Unspecified blepharitis</i>                | Wide  | 9A01.3  | Infectious blepharitis                                        | Equal    | No                              | Equal  |
| Infectious conjunctivitis                | C0497209  | 299699004 | Infective conjunctivitis                | Equal  | H10.8  | <i>Other conjunctivitis</i>                   | Wide  | 9A60.Y  | <i>Other specified conjunctivitis</i>                         | Subgroup | Infectious conjunctivitis       | Equal  |
| Infectious crystalline keratopathy       | C0339237  | 231909009 | Infectious crystalline keratopathy      | Equal  | H18.9  | <i>Unspecified disorder of cornea</i>         | Wide  | 9A78.Z  | <i>Certain specified disorders of the cornea, unspecified</i> | Wide     | No                              | Wide   |
| Infectious endophthalmitis               | C1532322  | 414491002 | Infectious endophthalmitis              | Equal  | H44.1  | <i>Other endophthalmitis</i>                  | Wide  | 9C21    | <i>Endophthalmitis</i>                                        | Wide     | No                              | Wide   |
| Infectious epithelial keratitis          | C4749790  | 771232003 | Infectious epithelial keratitis         | Equal  | H16.8  | <i>Other keratitis</i>                        | Wide  | 9A71    | <i>Infectious keratitis</i>                                   | Subgroup | Infectious epithelial keratitis | Equal  |
| Infectious intermediate choroiditis      | N/A       | 16553002  | <i>Choroiditis</i>                      | Wide   | H30    | <i>Chorioretinal inflammation</i>             | Wide  | 9B66.1  | Infectious intermediate choroiditis                           | Equal    | No                              | Equal  |
| Infectious keratitis                     | C3898765  | 733312003 | Keratitis caused by infection           | Equal  | H16.8  | <i>Other keratitis</i>                        | Wide  | 9A71    | Infectious keratitis                                          | Equal    | No                              | Equal  |
| Infectious optic neuritis                | C0029134  | 66760008  | <i>Optic neuritis</i>                   | Wide   | H46    | <i>Optic neuritis</i>                         | Wide  | 9C40.0  | <i>Infectious optic neuropathy</i>                            | Wide     | No                              | Wide   |
| Infectious panuveitis                    | C5230354  | 789116000 | Infectious panuveitis                   | Equal  | H44.11 | <i>Panuveitis</i>                             | Wide  | 9C20.1  | Infectious panuveitis                                         | Equal    | No                              | Equal  |
| Infectious scleritis                     | C14444691 | 410578007 | Infective scleritis                     | Equal  | H15.09 | <i>Other scleritis</i>                        | Wide  | 9B51    | <i>Scleritis</i>                                              | Wide     | No                              | Wide   |
| Infectious uveitis                       | C1444604  | 210477000 | Infective uveitis                       | Equal  | H44.11 | <i>Panuveitis</i>                             | Wide  | 9C20.1  | <i>Infectious panuveitis</i>                                  | Narrow   | No                              | Narrow |
| Infectious vitritis                      | C5208309  | 95802009  | <i>Vitritis</i>                         | Wide   | H43    | <i>Disorders of vitreous body</i>             | Wide  | 9B8Y    | <i>Other specified disorders of the vitreous body</i>         | Wide     | No                              | Wide   |
| Intermediate choroiditis                 | N/A       | 16553002  | <i>Choroiditis</i>                      | Wide   | H30    | <i>Chorioretinal inflammation</i>             | Wide  | 9B66    | Intermediate choroiditis                                      | Equal    | No                              | Equal  |
| Internal hordeolum                       | C0019919  | 414521009 | Internal hordeolum                      | Equal  | H00.02 | Hordeolum internum                            | Equal | 9A01.20 | Hordeolum internum                                            | Equal    | No                              | Equal  |

|                                          |           |           |                                          |        |        |                                          |        |              |                                                        |          |                                               |        |
|------------------------------------------|-----------|-----------|------------------------------------------|--------|--------|------------------------------------------|--------|--------------|--------------------------------------------------------|----------|-----------------------------------------------|--------|
| Interstitial keratitis                   | C0155088  | 1763009   | Interstitial keratitis                   | Equal  | H16.30 | Unspecified interstitial keratitis       | Equal  | 9A78.Z       | Certain specified disorders of the cornea, unspecified | Subgroup | Interstitial keratitis                        | Equal  |
| Intraretinal schisis                     | C4023321  | 44268007  | Retinoschisis                            | Equal  | H33.10 | Unspecified retinoschisis                | Narrow | 9B73.1       | Retinoschisis                                          | Equal    | No                                            | Equal  |
| Iridocyclitis                            | C0022073  | 77971008  | Iridocyclitis                            | Equal  | H20    | Iridocyclitis                            | Equal  | 9A96.Z       | Anterior uveitis, unspecified                          | Subgroup | Iridocyclitis                                 | Equal  |
| Iris nodosa                              | N/A       | 12371008  | Ophthalmia nodosa                        | Wide   | H16.24 | Ophthalmia nodosa                        | Wide   | 9C20.2       | Purulent endophthalmitis                               | Wide     | No                                            | Wide   |
| Iris papulosa                            | C1444597  | 410469004 | Iris papulosa                            | Equal  | H21.23 | Degeneration of iris                     | Wide   | 9A90.1       | Degeneration of iris                                   | Wide     | No                                            | Wide   |
| Iris roseola                             | C1444596  | 410468007 | Iris roseola                             | Equal  | H21.23 | Degeneration of iris                     | Wide   | 9A90.1       | Degeneration of iris                                   | Wide     | No                                            | Wide   |
| Iritis                                   | C0022081  | 6507400   | Iritis                                   | Equal  | H20    | Iridocyclitis                            | Wide   | 9A96.Z       | Anterior uveitis, unspecified                          | Subgroup | Iritis                                        | Equal  |
| Keratitis                                | C0022568  | 5888003   | Keratitis                                | Equal  | H16    | Keratitis                                | Equal  | 9A7Y         | Other specified disorders of the cornea                | Subgroup | keratitis or keratoconjunctivitis             | Equal  |
| Keratitis due to syphilis                | C0339233  | 19378600  | Keratitis due to syphilis                | Equal  | H16.8  | Other keratitis                          | Wide   | 1A6Z         | Syphilis, unspecified                                  | Subgroup | keratitis or keratoconjunctivitis in Syphilis | Equal  |
| Keratitis follicularis                   | C0022595  | 48611009  | Darier disease                           | Equal  | L11.0  | Acquired keratosis follicularis          | Narrow | LC00.Y       | Other specified keratinocytic epidermal hamartoma      | Wide     | No                                            | Wide   |
| Keratoconjunctivitis                     | C0022573  | 88151007  | Keratoconjunctivitis                     | Equal  | H16.2  | Keratoconjunctivitis                     | Equal  | 9A7Y         | Other specified disorders of the cornea                | Wide     | keratitis or keratoconjunctivitis             | Wide   |
| Keratoconjunctivitis due to acanthamoeba | C23830273 | 231896005 | Acanthamoeba keratitis                   | Narrow | B60.13 | Keratoconjunctivitis due to acanthamoeba | Equal  | 1F50/9A60.1  | Keratoconjunctivitis due to Acanthamoeba               | Equal    | No                                            | Equal  |
| Keratouveitis                            | C1299910  | 370506009 | Keratouveitis                            | Equal  | H16    | Keratitis                                | Wide   | 9A96.Z       | Anterior uveitis, unspecified                          | Subgroup | Keratouveitis                                 | Equal  |
| Late syphilitic episcleritis             | C2893359  | 860894002 | Episcleritis due to late syphilis        | Equal  | A52.71 | Late syphilitic oculopathy               | Wide   | 1A62.20/9B50 | Late syphilitic episcleritis                           | Equal    | No                                            | Equal  |
| Late syphilitic oculopathy               | C2893336  | 186842007 | Late congenital syphilitic oculopathy    | Narrow | A52.71 | Late syphilitic oculopathy               | Equal  | 1A60.2       | Late congenital syphilitic oculopathy                  | Narrow   | No                                            | Narrow |
| Leber stellate neuroretinitis            | C5396393  | 86609002  | Leber idiopathic stellate neuroretinitis | Equal  | H46    | Optic neuritis                           | Wide   | 9C40.2       | Neuroretinitis                                         | Subgroup | Leber idiopathic stellate neuroretinitis      | Equal  |
| Leptospirosis uveitis                    | C1532134  | 410476009 | Uveitis due to leptospirosis             | Equal  | H40    | Iridocyclitis                            | Wide   | 9A96         | Anterior uveitis                                       | Wide     | No                                            | Wide   |
| Listeria conjunctivitis                  | C0275684  | 29786001  | Listeria conjunctivitis                  | Equal  | H10    | Conjunctivitis                           | Wide   | 9A60         | Conjunctivitis                                         | Wide     | No                                            | Wide   |
| Loiasis                                  | C0023968  | 44250009  | Infection by Loa Loa                     | Equal  | B74.3  | Loiasis                                  | Equal  | 1F66.0       | Loiasis                                                | Equal    | No                                            | Equal  |
| Lyme conjunctivitis                      | C1444602  | 410475008 | Lyme conjunctivitis                      | Equal  | H10    | Conjunctivitis                           | Wide   | 1C1G.12      | Ophthalmic Lyme borreliosis                            | Wide     | No                                            | Wide   |
| Lyme iridocyclitis                       | N/A       | 410473001 | Lyme uveitis                             | Wide   | H20    | Iridocyclitis                            | Wide   | 1C1G.12      | Ophthalmic Lyme borreliosis                            | Subgroup | Lyme iridocyclitis                            | Equal  |
| Lyme keratitis                           | C1444601  | 410474007 | Lyme keratitis                           | Equal  | H16    | Keratitis                                | Wide   | 1C1G.12      | Ophthalmic Lyme borreliosis                            | Wide     | No                                            | Wide   |
| Lyme uveitis                             | C1444600  | 410473001 | Lyme uveitis                             | Equal  | H20    | Iridocyclitis                            | Wide   | 1C1G.12      | Ophthalmic Lyme borreliosis                            | Subgroup | Lyme uveitis                                  | Equal  |



|                                               |             |           |                                                 |              |        |                                                   |               |         |                                                         |                 |                                               |              |
|-----------------------------------------------|-------------|-----------|-------------------------------------------------|--------------|--------|---------------------------------------------------|---------------|---------|---------------------------------------------------------|-----------------|-----------------------------------------------|--------------|
| <b>Macular granuloma</b>                      | C2074217/47 | 72776003  | <i>Orbital granuloma</i>                        | <i>Wide</i>  | H05.11 | Granuloma of orbit                                | <i>Wide</i>   | 9A22.2  | Granulomatous orbital inflammation                      | <i>Wide</i>     | No                                            | <i>Wide</i>  |
| <b>Marginal keratitis</b>                     | C0521714    | 95730003  | Marginal keratitis                              | <b>Equal</b> | H16    | <i>Keratitis</i>                                  | <i>Wide</i>   | 9A7Y    | <i>Other specified disorders of the cornea</i>          | <i>Wide</i>     | No                                            | <i>Wide</i>  |
| <b>Measles keratitis</b>                      | C0276335    | 28463004  | Measles keratitis                               | <b>Equal</b> | B05.81 | <i>Measles keratitis and keratoconjunctivitis</i> | <i>Narrow</i> | 1F03.Y  | <i>Measles with other complications</i>                 | <i>Subgroup</i> | Keratitis and keratoconjunctivitis in measles | <b>Equal</b> |
| <b>Measles keratoconjunctivitis</b>           | C0153052    | 60013002  | Measles keratoconjunctivitis                    | <b>Equal</b> | B05.81 | <i>Measles keratitis and keratoconjunctivitis</i> | <i>Narrow</i> | 1F03.Y  | <i>Measles with other complications</i>                 | <i>Subgroup</i> | Keratitis and keratoconjunctivitis in measles | <b>Equal</b> |
| <b>Membranous conjunctivitis</b>              | C0311343    | 102451006 | Membranous conjunctivitis                       | <b>Equal</b> | H10    | <i>Conjunctivitis</i>                             | <i>Wide</i>   | 9A60    | <i>Conjunctivitis</i>                                   | <i>Subgroup</i> | Pseudomembranous conjunctivitis               | <b>Equal</b> |
| <b>Meningococcal conjunctivitis</b>           | C0686709    | 94151004  | Meningococcal conjunctivitis                    | <b>Equal</b> | H10    | <i>Conjunctivitis</i>                             | <i>Wide</i>   | 1C1C.Y  | <i>Other specified meningococcal disease</i>            | <i>Subgroup</i> | Meningococcal conjunctivitis                  | <b>Equal</b> |
| <b>Meningococcal optic neuritis</b>           | C01529662   | 73431005  | Meningococcal optic neuritis                    | <b>Equal</b> | A39.82 | Meningococcal retrobulbar neuritis                | <b>Equal</b>  | 9C40.10 | <i>Retrobulbar neuritis</i>                             | <i>Wide</i>     | No                                            | <i>Wide</i>  |
| <b>Metaherpetic ulcers</b>                    | N/A         | 5888003   | <i>Keratitis</i>                                | <i>Wide</i>  | H16    | <i>Keratitis</i>                                  | <i>Wide</i>   | 9A74    | <i>Neurotrophic keratitis</i>                           | <i>Subgroup</i> | Neurotrophic keratitis, metaherpetic ulcers   | <b>Equal</b> |
| <b>Mooren's ulcer</b>                         | C0155072    | 22440001  | Mooren's ulcer                                  | <b>Equal</b> | H16.05 | Mooren's corneal ulcer                            | <b>Equal</b>  | 9A76    | <i>Corneal ulcer</i>                                    | <i>Subgroup</i> | Mooren's ulcer                                | <b>Equal</b> |
| <b>Mucopurulent conjunctivitis</b>            | C0009768    | 243462001 | Mucopurulent conjunctivitis                     | <b>Equal</b> | H10.0  | Mucopurulent conjunctivitis                       | <b>Equal</b>  | 9A60.3  | Mucopurulent conjunctivitis                             | <b>Equal</b>    | No                                            | <b>Equal</b> |
| <b>Multifocal retinitis</b>                   | N/A         | 399463004 | <i>Retinitis</i>                                | <i>Wide</i>  | H30    | <i>Chorioretinal inflammation</i>                 | <i>Wide</i>   | 9B72.Z  | <i>Inflammatory diseases of the retina, unspecified</i> | <i>Wide</i>     | No                                            | <i>Wide</i>  |
| <b>Multiple evanescent white dot syndrome</b> | C0730322    | 312951006 | Multiple evanescent white dot syndrome          | <b>Equal</b> | H30    | <i>Chorioretinal inflammation</i>                 | <i>Wide</i>   | 9B65.0  | <i>Noninfectious posterior choroiditis</i>              | <i>Subgroup</i> | Multiple evanescent white dot syndrome        | <b>Equal</b> |
| <b>Mycobacterial keratitis</b>                | C1960555    | 425618009 | Mycobacterial keratitis                         | <b>Equal</b> | A18.52 | <i>Tuberculous keratitis</i>                      | <i>Narrow</i> | 1B12.1  | <i>Tuberculosis of eye</i>                              | <i>Wide</i>     | No                                            | <i>Wide</i>  |
| <b>Mycobacterium tuberculosis panuveitis</b>  | C5396740    | 870333003 | Panuveitis caused by mycobacterium tuberculosis | <b>Equal</b> | H44.11 | <i>Panuveitis</i>                                 | <i>Wide</i>   | 1B12.1  | <i>Tuberculosis of eye</i>                              | <i>Wide</i>     | No                                            | <i>Wide</i>  |
| <b>Mycotic corneal ulcer</b>                  | C0155071    | 397977001 | Mycotic corneal ulcer                           | <b>Equal</b> | H16.06 | Mycotic corneal ulcer                             | <b>Equal</b>  | 9A76    | <i>Corneal ulcer</i>                                    | <i>Subgroup</i> | Mycotic corneal ulcer                         | <b>Equal</b> |
| <b>Mycotic keratitis due to fusarium</b>      | C0276760    | 45194000  | Mycotic keratitis due to fusarium               | <b>Equal</b> | H16.8  | <i>Other keratitis</i>                            | <i>Wide</i>   | 9A71    | <i>Infectious keratitis</i>                             | <i>Wide</i>     | No                                            | <i>Wide</i>  |
| <b>Necrotizing herpetic retinopathy</b>       | C1282534    | 315288007 | Necrotizing herpetic retinopathy                | <b>Equal</b> | H35.00 | <i>Unspecified background retinopathy</i>         | <i>Wide</i>   | 9B71    | <i>Retinopathy</i>                                      | <i>Wide</i>     | No                                            | <i>Wide</i>  |
| <b>Neuroretinitis</b>                         | C0154874    | 410471004 | Neuroretinitis                                  | <b>Equal</b> | H30    | <i>Chorioretinal inflammation</i>                 | <i>Wide</i>   | 9C40.2  | Neuroretinitis                                          | <b>Equal</b>    | No                                            | <b>Equal</b> |
| <b>Neurotrophic keratopathy</b>               | C0339296    | 128080005 | Neurotrophic keratitis                          | <b>Equal</b> | H16.23 | <i>Neurotrophic keratoconjunctivitis</i>          | <i>Narrow</i> | 1F00.10 | <i>Herpes simplex keratitis(It is Subgroup)</i>         | <i>Subgroup</i> | Neurotrophic keratopathy                      | <b>Equal</b> |
| <b>Nodular episcleritis</b>                   | C0155325    | 70558001  | Nodular episcleritis                            | <b>Equal</b> | H15.12 | Nodular episcleritis                              | <b>Equal</b>  | 9B50    | <i>Episcleritis</i>                                     | <i>Subgroup</i> | Nodular episcleritis                          | <b>Equal</b> |
| <b>Nodular scleritis</b>                      | C0339194    | 95195003  | Nodular scleritis                               | <b>Equal</b> | H15.0  | <i>Scleritis</i>                                  | <i>Wide</i>   | 9B51    | <i>Scleritis</i>                                        | <i>Wide</i>     | No                                            | <i>Wide</i>  |

|                                |          |                                       |                                           |        |        |                                                  |        |         |                                      |          |                                                                                                   |       |
|--------------------------------|----------|---------------------------------------|-------------------------------------------|--------|--------|--------------------------------------------------|--------|---------|--------------------------------------|----------|---------------------------------------------------------------------------------------------------|-------|
| Ocular bartonellosis           | N/A      | 410472006                             | <i>Bartonella henselae</i> neuroretinitis | Narrow | A44    | Bartonellosis                                    | Wide   | 1C11.Y  | Other form of bartonellosis          | Wide     | No                                                                                                | Wide  |
| Ocular histoplasmosis syndrome | C1562543 | 415770009                             | Ocular histoplasmosis syndrome            | Equal  | B39    | Histoplasmosis                                   | Wide   | 1F2A.Y  | Other specified histoplasmosis       | Wide     | No                                                                                                | Wide  |
| Ocular nocardiosis             | N/A      | 29227009                              | Nocardiosis                               | Wide   | A43.8  | Other form of nocardiosis                        | Wide   | 1C1B.Y  | Other specified forms of nocardiosis | Wide     | No                                                                                                | Wide  |
| Ocular toxocariasis            | C0040553 | 240866006                             | Ocular toxocariasis                       | Equal  | B83.0  | Visceral larva migrans                           | Wide   | 1F6D    | Toxocariasis                         | Wide     | No                                                                                                | Wide  |
| Ocular toxoplasmosis           | C0040561 | 416481006                             | Ocular toxoplasmosis                      | Equal  | B58.8  | Toxoplasmosis with other organ involvement       | Wide   | 1F57.3  | Eye disease due to Toxoplasma gondii | Equal    | No                                                                                                | Equal |
| Onchocerca chorioretinitis     | C0339415 | 231992006                             | Onchocerca chorioretinitis                | Equal  | B73.00 | Onchocerciasis with eye involvement, unspecified | Wide   | 1F6A.0  | Onchocerciasis of the eye            | Wide     | No                                                                                                | Wide  |
| Onchocerciasis endophthalmitis | C1396619 | 57100005                              | Parasitic endophthalmitis                 | Wide   | B73.01 | Onchocerciasis with endophthalmitis              | Equal  | 1F6A.0  | Onchocerciasis of the eye            | Subgroup | Onchocerciasis endophthalmitis                                                                    | Equal |
| Optic neuritis                 | C0029134 | 66760008                              | Optic neuritis                            | Equal  | H46    | Optic neuritis                                   | Equal  | 9C40.1  | Optic neuritis                       | Equal    | No                                                                                                | Equal |
| Orbital abscess                | C0271331 | 39828002                              | Abscess of orbit                          | Equal  | H05    | Disorders of orbit                               | Wide   | 9A21.2  | Orbital abscess                      | Equal    | No                                                                                                | Equal |
| Orbital cellulitis             | C0149507 | 194005002                             | Orbital cellulitis                        | Equal  | H05.01 | Cellulitis of orbit                              | Equal  | 9A01.0  | Orbital cellulitis                   | Equal    | No                                                                                                | Equal |
| Orbital mucormycosis           | C1301527 | 397562003                             | Orbital mucormycosis                      | Equal  | B46.1  | Rhinocerebral mucormycosis                       | Wide   | 1F2C    | Mucormycosis                         | Wide     | No                                                                                                | Wide  |
| Panophthalmitis                | C0030332 | 33382000                              | Panophthalmitis                           | Equal  | H44.01 | Panophthalmitis (acute)                          | Narrow | 9C20.2  | Purulent endophthalmitis             | Subgroup | Panophthalmitis                                                                                   | Equal |
| Panuveitis                     | C0030343 | 75614007                              | Panuveitis                                | Equal  | H44.11 | Panuveitis                                       | Equal  | 9C20    | Panuveitis                           | Equal    | No                                                                                                | Equal |
| Papillary conjunctivitis       | C0854165 | 416878008                             | Papillary conjunctivitis                  | Equal  | H10.41 | Chronic giant papillary conjunctivitis           | Narrow | 9A60.0  | Papillary conjunctivitis             | Equal    | No                                                                                                | Equal |
| Papilledema                    | C0030353 | 15731521000119100 / 15731561000119100 | Papilledema of right/left eye             | Equal  | H47.1  | Papilledema                                      | Equal  | 9C40.A0 | Papilloedema                         | Equal    | No                                                                                                | Equal |
| Papillitis                     | C2881208 | 73221001                              | Optic papillitis                          | Equal  | H46.0  | Optic papillitis                                 | Equal  | 9C40.1Y | Other specified optic neuritis       | Wide     | Papillitis NOS                                                                                    | Wide  |
| Parasitic chorioretinitis      | C2937242 | 359698000                             | Parasitic chorioretinitis                 | Equal  | H30    | Chorioretinal inflammation                       | Wide   | 9B65.2  | Chorioretinal inflammation           | Subgroup | Chorioretinal inflammation in infectious and parasitic disease classified elsewhere               | Equal |
| Parasitic choroiditis          | C0339413 | 359695002                             | Parasitic choroiditis                     | Equal  | H30    | Chorioretinal inflammation                       | Wide   | 9B65    | Choroiditis                          | Wide     | No                                                                                                | Wide  |
| Parasitic conjunctivitis       | C0155148 | 13816006                              | Parasitic conjunctivitis                  | Equal  | H10.8  | Other conjunctivitis                             | Wide   | 9A71    | Infectious keratitis                 | Subgroup | Keratitis and keratoconjunctivitis in other infectious and parasitic disease classified elsewhere | Equal |
| Parasitic endophthalmitis      | C0014238 | 57100005                              | Parasitic endophthalmitis                 | Equal  | H44.12 | Parasitic endophthalmitis, unspecified           | Equal  | 9C21.Y  | Other specified endophthalmitis      | Subgroup | Parasitic endophthalmitis                                                                         | Equal |
| Parasitic panuveitis           | C5396737 | 870330000                             | Panuveitis caused by parasite             | Equal  | H44.11 | Panuveitis                                       | Wide   | 9C20.1  | Infectious panuveitis                | Subgroup | Parasitic panuveitis                                                                              | Equal |

|                                          |          |                                 |                                          |        |         |                                            |        |         |                                                     |          |                                    |       |
|------------------------------------------|----------|---------------------------------|------------------------------------------|--------|---------|--------------------------------------------|--------|---------|-----------------------------------------------------|----------|------------------------------------|-------|
| Parinaud oculoglandular syndrome         | C1409213 | 37991008                        | Parinaud syndrome                        | Wide   | H10.8   | Other conjunctivitis                       | Wide   | 9A60.Y  | Other specified conjunctivitis                      | Subgroup | Parinaud oculoglandular syndrome   | Equal |
| Parinaud syndrome                        | C0152222 | 37991008                        | Parinaud syndrome                        | Equal  | H51.0   | Palsy (spasm) of conjugate gaze            | Wide   | 9C83.01 | Vertical gaze palsy                                 | Subgroup | Parinaud syndrome                  | Equal |
| Pars planitis                            | C0030593 | 45688009                        | Pars planitis                            | Equal  | H20.9   | Cyclitis                                   | Wide   | 9B66.0  | Noninfectious intermediate choroiditis              | Subgroup | Pars planitis                      | Equal |
| Phthiriasis palpebrum                    | C1274549 | 403143009                       | Phthiriasis of eyelashes                 | Equal  | B85.3   | Phthiriasis                                | Equal  | 1G03    | Phthiriasis                                         | Equal    | No                                 | Equal |
| Pneumocystis jirovecii choroiditis       | C0339416 | 443201006                       | Pneumocystis jirovecii choroiditis       | Equal  | H30     | Chorioretinal inflammation                 | Wide   | 9B65    | Choroiditis                                         | Wide     | No                                 | Wide  |
| Posterior blepharitis                    | N/A      | 41446000                        | Blepharitis                              | Wide   | H01.0   | Blepharitis                                | Wide   | 9A02.1  | Posterior blepharitis                               | Equal    | No                                 | Equal |
| Posterior scleritis                      | C0155357 | 267660007                       | Posterior scleritis                      | Equal  | H15.03  | Posterior scleritis                        | Equal  | 9B51    | Scleritis                                           | Subgroup | Posterior scleritis                | Equal |
| Posterior uveitis                        | C0042167 | 43363007                        | Posterior uveitis                        | Equal  | H20     | Iridocyclitis                              | Wide   | 9B65.Z  | Choroiditis, unspecified                            | Subgroup | Posterior uveitis                  | Equal |
| Postoperative infectious endophthalmitis | C1444624 | 410497005                       | Postoperative infectious endophthalmitis | Equal  | H44.1   | Other endophthalmitis                      | Wide   | 9B72.Y  | Other specified inflammatory diseases of the retina | Wide     | No                                 | Wide  |
| Preseptal cellulitis                     | C1282208 | 314516007                       | Preseptal cellulitis                     | Equal  | L03.213 | Periorbital cellulitis                     | Narrow | 9A01.0  | Preseptal cellulitis                                | Equal    | No                                 | Equal |
| Primary ocular tuberculosis              | N/A      | 49107007                        | Ocular tuberculosis                      | Wide   | A18.5   | Tuberculosis of eye                        | Wide   | 1B12.1  | Tuberculosis of eye                                 | Wide     | No                                 | Wide  |
| Progressive outer retinal necrosis       | C0730302 | 312933005                       | Progressive outer retinal necrosis       | Equal  | H30     | Chorioretinal inflammation                 | Wide   | 9B65.1  | Infectious posterior choroiditis                    | Subgroup | Progressive outer retinal necrosis | Equal |
| Propionibacterium acnes endophthalmitis  | C1533046 | 415182001                       | Propionibacterium acnes endophthalmitis  | Equal  | H44.1   | Other endophthalmitis                      | Wide   | 9B72.Y  | Other specified inflammatory diseases of the retina | Wide     | No                                 | Wide  |
| Punctate keratitis                       | C0259799 | 338411000119106/332801000119108 | Left/right punctate keratitis            | Equal  | H16.14  | Punctate keratitis                         | Equal  | 9A78.Z  | Certain disorders of cornea, unspecified            | Subgroup | Punctate keratitis                 | Equal |
| Punctate outer retinal toxoplasmosis     | C1532019 | 415218004                       | Punctate outer retinal toxoplasmosis     | Equal  | B58.8   | Toxoplasmosis with other organ involvement | Wide   | 1F57.3  | Eye disease due to Toxoplasma gondii                | Wide     | No                                 | Wide  |
| Purulent conjunctivitis                  | C0009768 | 243321006                       | Purulent conjunctivitis                  | Equal  | H10.0   | Mucopurulent conjunctivitis                | Narrow | 9A60.3  | Mucopurulent conjunctivitis                         | Equal    | No                                 | Equal |
| Purulent endophthalmitis                 | C0259800 | 4172003                         | Purulent endophthalmitis                 | Equal  | H44.0   | Purulent endophthalmitis                   | Equal  | 9C20.2  | Purulent endophthalmitis                            | Equal    | No                                 | Equal |
| Pyogenic granuloma of eye                | N/A      | 200722003                       | Pyogenic granuloma                       | Wide   | L98.0   | Pyogenic granuloma                         | Wide   | 9C20.2  | Purulent endophthalmitis                            | Wide     | No                                 | Wide  |
| Retinal vasculitis                       | C0152026 | 77628002                        | Retinal vasculitis                       | Equal  | H35.06  | Retinal vasculitis                         | Equal  | 9B78.12 | Retinal vasculitis                                  | Equal    | No                                 | Equal |
| Retinitis                                | C0035333 | 399463004                       | Retinitis                                | Equal  | H30     | Chorioretinal inflammation                 | Narrow | 9B72.Z  | Inflammatory diseases of the retina, unspecified    | Subgroup | Retinitis NOS                      | Equal |
| Retrolubar neuritis                      | C0085582 | 230507009                       | Retrolubar neuritis                      | Equal  | H46.1   | Retrolubar neuritis                        | Equal  | 9C40.10 | Retrolubar neuritis                                 | Equal    | No                                 | Equal |
| Rhino-orbito-cerebral mucormycosis       | C0348802 | 397562003                       | Orbital mucormycosis                     | Narrow | B46.1   | Rhinocerebral mucormycosis                 | Wide   | 1F2C    | Mucormycosis                                        | Wide     | No                                 | Wide  |

|                                      |          |             |                                      |       |         |                                     |        |               |                                                     |          |                                       |        |
|--------------------------------------|----------|-------------|--------------------------------------|-------|---------|-------------------------------------|--------|---------------|-----------------------------------------------------|----------|---------------------------------------|--------|
| Roth spot                            | C0240916 | 95688008    | Roth spots                           | Equal | H35.6   | Retinal hemorrhage                  | Wide   | 9B78.5        | Retinal hemorrhage                                  | Wide     | No                                    | Wide   |
| Rubella retinopathy                  | C0339408 | 231985001   | Rubella retinopathy                  | Equal | H30     | Chorioretinal inflammation          | Wide   | 9B72.Y        | Other specified inflammatory diseases of the retina | Wide     | No                                    | Wide   |
| Rubeola retinopathy                  | C1563255 | 417145006   | Rubeola retinopathy                  | Equal | H30     | Chorioretinal inflammation          | Wide   | 9B72.Y        | Other specified inflammatory diseases of the retina | Wide     | No                                    | Wide   |
| Scleral abscess                      | C0271402 | 50675000    | Scleral abscess                      | Equal | H15     | Disorders of sclera                 | Wide   | 9B51          | Scleritis(Subgroup)                                 | Subgroup | Scleral abscess                       | Equal  |
| Scleritis                            | C0036416 | 78370002    | Scleritis                            | Equal | H15.0   | Scleritis                           | Equal  | 9B51          | Scleritis                                           | Equal    | No                                    | Equal  |
| Scleroconjunctivitis                 | C1409550 | 9826008     | Conjunctivitis                       | Wide  | H10     | Conjunctivitis                      | Wide   | 9A60          | Conjunctivitis                                      | Subgroup | Scleroconjunctivitis                  | Equal  |
| Sclerosing keratitis                 | C0155090 | 27886001    | Sclerosing keratitis                 | Equal | H16.33  | Sclerosing keratitis                | Equal  | 9A78.A        | Sclerosing keratitis                                | Equal    | No                                    | Equal  |
| Sclerouveitis                        | C0521677 | 95680001    | Sclerouveitis                        | Equal | H15.0   | Scleritis                           | Wide   | 9B51          | Scleritis                                           | Wide     | No                                    | Wide   |
| Secondary infectious iridocyclitis   | C0154911 | 193487008   | Secondary infected iridocyclitis     | Equal | H20.03  | Secondary infectious iridocyclitis  | Equal  | 9A96.Z        | Anterior uveitis, unspecified                       | Wide     | No                                    | Wide   |
| Secondary infectious uveitis         | C3536575 | 4.34391E+14 | Secondary infected uveitis           | Equal | H20.03  | Secondary infectious iridocyclitis  | Wide   | 9A96.Y        | Other specified anterior uveitis                    | Wide     | No                                    | Wide   |
| Secondary syphilitic chorioretinitis | C0153145 | 66281009    | Secondary syphilitic chorioretinitis | Equal | H30     | Chorioretinal inflammation          | Wide   | 9B65.2        | Chorioretinal inflammation                          | Subgroup | Secondary infectious anterior uveitis | Equal  |
| Secondary syphilitic iridocyclitis   | C0153146 | 3008002     | Secondary syphilitic iridocyclitis   | Equal | H20.03  | Secondary infectious iridocyclitis  | Wide   | 1A61.4/9A96.2 | Secondary syphilitic anterior uveitis               | Subgroup | Secondary syphilitic iridocyclitis    | Equal  |
| Secondary syphilitic oculopathy      | C2893334 | 1052322008  | Secondary syphilis of eye            | Equal | A51.43  | Secondary syphilitic oculopathy     | Equal  | 1A61.4        | Secondary syphilis of other sites                   | Wide     | No                                    | Wide   |
| Secondary syphilitic uveitis         | C0275836 | 186854007   | Uveitis due to secondary syphilis    | Equal | A51.43  | Secondary syphilitic oculopathy     | Wide   | 1A61.4/9A96.2 | Secondary syphilitic anterior uveitis               | Narrow   | No                                    | Narrow |
| Serous conjunctivitis                | C0339159 | 193859006   | Serous conjunctivitis                | Equal | H10.23  | Serous conjunctivitis, except viral | Narrow | 9A60.6        | Serous conjunctivitis, except viral                 | Narrow   | No                                    | Narrow |
| Serpiginous choroiditis              | C0729842 | 312491004   | Serpiginous choroiditis              | Equal | H30     | Chorioretinal inflammation          | Wide   | 9B65.0        | Noninfectious posterior choroiditis                 | Subgroup | Serpiginous choroiditis               | Equal  |
| Simple episcleritis                  | C0339192 | 231873005   | Simple episcleritis                  | Equal | H15.1   | Episcleritis                        | Wide   | 9B50          | Episcleritis                                        | Wide     | No                                    | Wide   |
| Solitary raised chorioretinal lesion | C0423441 | 247189002   | Solitary raised chorioretinal lesion | Equal | H31.0   | Chorioretinal scar                  | Wide   | 9B62          | Chorioretinal scar                                  | Wide     | No                                    | Wide   |
| Staphylococcal blepharitis           | C0241812 | 278808000   | Staphylococcal blepharitis           | Equal | H01.009 | Blepharitis (angularis)             | Equal  | 9A60.4        | Blepharoconjunctivitis                              | Wide     | No                                    | Wide   |
| Stellate keratitis                   | C0271262 | 70615006    | Stellate keratitis                   | Equal | H16     | Keratitis                           | Wide   | 9A78.Z        | Certain specified disorders of cornea, unspecified  | Subgroup | Stellate keratitis                    | Equal  |
| Stye                                 | C0019919 | 193912000   | Stye                                 | Equal | H00     | Hordeolum and chalazion             | Wide   | 9A01.20       | Hordeolum externum                                  | Subgroup | Stye                                  | Equal  |

|                                           |          |                                       |                                                    |        |                 |                                                   |        |                |                                                    |          |                                                           |        |
|-------------------------------------------|----------|---------------------------------------|----------------------------------------------------|--------|-----------------|---------------------------------------------------|--------|----------------|----------------------------------------------------|----------|-----------------------------------------------------------|--------|
| Subacute iridocyclitis                    | C5441519 | 1144419002                            | Subacute iridocyclitis                             | Equal  | H20.0           | Acute and subacute iridocyclitis                  | Narrow | 9A96.Y         | Other specified anterior uveitis                   | Subgroup | Subacute iridocyclitis                                    | Equal  |
| Subperiosteal orbit abscess               | C1960657 | 427692005                             | Subperiosteal abscess of orbit                     | Equal  | H05.01          | Cellulitis of orbit                               | Wide   | 9A21.1         | Orbital subperiosteal abscess                      | Equal    | No                                                        | Equal  |
| Superficial keratitis                     | C0155074 | 2701900                               | Superficial keratitis                              | Equal  | H16.10          | Unspecified superficial keratitis                 | Equal  | 9A78.Z         | Certain specified disorders of cornea, unspecified | Subgroup | Superficial keratitis NOS                                 | Equal  |
| Superficial scleritis                     | C0521767 | 95795006                              | Superficial scleritis                              | Equal  | H15.0           | Scleritis                                         | Wide   | 9B51           | Scleritis                                          | Wide     | No                                                        | Wide   |
| Syphilitic chorioretinitis                | C0238057 | 312934004                             | Syphilitic chorioretinitis                         | Equal  | A50.32          | Late congenital syphilitic chorioretinitis        | Narrow | 1A62.20        | Ocular late syphilis                               | Wide     | No                                                        | Wide   |
| Syphilitic choroiditis                    | C3840052 | 3.31151E+14                           | Syphilitic choroiditis                             | Equal  | A52.71          | Late syphilitic aculopathy                        | Wide   | 1A60.0/9B65.1  | Congenital syphilitic choroiditis                  | Wide     | No                                                        | Wide   |
| Syphilitic disseminated retinochoroiditis | C0153170 | 77939001                              | Syphilitic disseminated retinochoroiditis          | Equal  | A52.71          | Late syphilitic aculopathy                        | Wide   | 1A60.0/9B65.2  | Congenital syphilitic choroiditis                  | Wide     | No                                                        | Wide   |
| Syphilitic episcleritis                   | C0153176 | 11338007                              | Syphilitic episcleritis                            | Equal  | A52.71          | Late syphilitic oculopathy                        | Wide   | 1A62.20/9B50   | Late syphilitic episcleritis                       | Narrow   | No                                                        | Narrow |
| Syphilitic interstitial keratitis         | C0153131 | 44568006                              | Syphilitic interstitial keratitis                  | Equal  | A50.31          | Late congenital syphilitic interstitial keratitis | Narrow | 1A60.2         | Late congenital syphilitic oculopathy              | Wide     | No                                                        | Wide   |
| Syphilitic retinitis                      | C1444598 | 410470003                             | Syphilitic retinitis                               | Equal  | A50.71          | Late syphilitic oculopathy                        | Wide   | 1A6Z           | Syphilis unspecified                               | Subgroup | Intestinal keratitis and keratoconjunctivitis in syphilis | Equal  |
| Syphilitic uveitis                        | C5567809 | 70983007                              | Secondary syphilitic uveitis                       | Narrow | A50.71          | Late syphilitic oculopathy                        | Wide   | 1A62.20/9A96.2 | Syphilitic uveitis                                 | Equal    | No                                                        | Equal  |
| Tertiary syphilitic chorioretinitis       | C0730327 | 312955002                             | Tertiary syphilitic chorioretinitis                | Equal  | A50.71          | Late syphilitic oculopathy                        | Wide   | 1A60.0/9B65.2  | Congenital syphilitic choroiditis                  | Wide     | No                                                        | Wide   |
| Toxocara chorioretinitis                  | C0339417 | 231994007                             | Toxocara chorioretinitis                           | Equal  | H30             | Chorioretinal inflammation                        | Wide   | 1F6D           | Toxocariasis                                       | Wide     | No                                                        | Wide   |
| Toxocara endophthalmitis                  | C1532408 | 415737009                             | Toxocara endophthalmitis                           | Equal  | H44.1           | Other endophthalmitis                             | Wide   | 16FD           | Toxocariasis                                       | Subgroup | Toxocara endophthalmitis                                  | Equal  |
| Toxoplasma choroiditis                    | C2830053 | 3.31E+14                              | Toxoplasma choroiditis                             | Equal  | B58.01          | Toxoplasma chorioretinitis                        | Wide   | 1F57.3/9B65.2  | Toxoplasma chorioretinitis                         | Wide     | No                                                        | Wide   |
| Toxoplasma retinitis                      | C0748386 | 416589006                             | Toxoplasma retinitis                               | Equal  | B58.01          | Toxoplasma chorioretinitis                        | Wide   | 1F57.3/9B65.2  | Toxoplasma chorioretinitis                         | Wide     | No                                                        | Wide   |
| Toxoplasma uveitis                        | C2830266 | 15992991000119100 / 15992951000119100 | Uveitis of left/right eye due to Toxoplasma gondii | Equal  | B58.8           | Toxoplasmosis with other organ involvement        | Wide   | 1F57.3/9B65.1  | Toxoplasma posterior uveitis                       | Narrow   | No                                                        | Narrow |
| Toxoplasmosis chorioretinitis             | C0153308 | 187194004                             | Toxoplasmosis chorioretinitis                      | Equal  | B58.01          | Toxoplasma chorioretinitis                        | Equal  | 1F57.3/9B65.2  | Toxoplasma chorioretinitis                         | Equal    | No                                                        | Equal  |
| Trabeculitis                              | C1444626 | 410499008                             | Trabeculitis                                       | Equal  | H20             | Iridocyclitis                                     | Wide   | 9A96.Z         | Anterior uveitis, unspecified                      | Wide     | No                                                        | Wide   |
| Trachoma                                  | C0040592 | 2576002                               | Trachoma                                           | Equal  | A71             | Trachoma                                          | Equal  | 1C23           | Trachoma                                           | Equal    | No                                                        | Equal  |
| Trachomatous dacryocystitis               | C1394669 | 85777005                              | Dacryocystitis                                     | Narrow | A71.1           | Active stage of trachoma                          | Wide   | 9A11.2         | Dacryocystitis                                     | Wide     | No                                                        | Wide   |
| Trachomatous follicular conjunctivitis    | c0276103 | 27020006                              | Trachomatous follicular conjunctivitis             | Equal  | H10.01 / H10.43 | Acute/chronic follicular conjunctivitis           | Wide   | 1C23.1         | Active stage of trachoma                           | Subgroup | Trachomatous follicular conjunctivitis                    | Equal  |

|                                           |          |           |                                          |               |        |                                        |               |               |                                                       |                 |                        |               |
|-------------------------------------------|----------|-----------|------------------------------------------|---------------|--------|----------------------------------------|---------------|---------------|-------------------------------------------------------|-----------------|------------------------|---------------|
| Trachomatous keratitis                    | C1401581 | 55555001  | <i>Trachomatous pannus</i>               | <i>Narrow</i> | H16.8  | Other keratitis                        | <i>Wide</i>   | 1C23.1        | Active stage of trachoma                              | <i>Subgroup</i> | Trachomatous keratitis | <b>Equal</b>  |
| Treponema pallidum panuveitis             | C5396738 | 870331001 | Panuveitis caused by Treponema pallidum  | <b>Equal</b>  | H44.11 | <i>Panuveitis</i>                      | <i>Wide</i>   | 9C20          | <i>Panuveitis</i>                                     | <i>Wide</i>     | No                     | <i>Wide</i>   |
| Tuberculosis chronic iridocyclitis        | C0275947 | 186266008 | Tuberculous chronic iridocyclitis        | <b>Equal</b>  | A18.54 | <i>Tuberculous iridocyclitis</i>       | <i>Wide</i>   | 1B12.1/9A96.2 | Chronic tuberculous iridocyclitis                     | <b>Equal</b>    | No                     | <b>Equal</b>  |
| Tuberculosis disseminated chorioretinitis | C0275944 | 48225000  | Tuberculous disseminated chorioretinitis | <b>Equal</b>  | A18.53 | <i>Tuberculous chorioretinitis</i>     | <i>Wide</i>   | 1B12.1/9B65.2 | Tuberculous chorioretinitis                           | <b>Equal</b>    | No                     | <b>Equal</b>  |
| Tuberculosis panophthalmitis              | N/A      | 33382000  | <i>Panophthalmitis</i>                   | <i>Wide</i>   | H44.01 | <i>Panophthalmitis (acute)</i>         | <i>Wide</i>   | 9C20.2        | <i>Purulent endophthalmitis</i>                       | <i>Wide</i>     | No                     | <i>Wide</i>   |
| Tuberculosis retinitis                    | C1407691 | 95685006  | <i>Granulomatous retinitis</i>           | <i>Wide</i>   | A18.53 | <i>Tuberculous chorioretinitis</i>     | <i>Narrow</i> | 1B12.1/9B65.2 | <i>Tuberculous chorioretinitis</i>                    | <i>Wide</i>     | No                     | <i>Wide</i>   |
| Tuberculous chorioretinitis               | C0339410 | 186263000 | Tuberculous chorioretinitis              | <b>Equal</b>  | A18.53 | Tuberculous chorioretinitis            | <b>Equal</b>  | 1B12.1/9B65.2 | Tuberculous chorioretinitis                           | <b>Equal</b>    | No                     | <b>Equal</b>  |
| Tuberculous episcleritis                  | C0275945 | 84288007  | Tuberculous episcleritis                 | <b>Equal</b>  | A18.51 | Tuberculous episcleritis               | <b>Equal</b>  | 1B12.1/9B50   | Tuberculous episcleritis                              | <b>Equal</b>    | No                     | <b>Equal</b>  |
| Tuberculous uveitis                       | C1281935 | 314029000 | Tuberculous uveitis                      | <b>Equal</b>  | A18.54 | <i>Tuberculous iridocyclitis</i>       | <i>Wide</i>   | 1B12.1/9A96.2 | <i>Tuberculous anterior uveitis</i>                   | <i>Narrow</i>   | No                     | <i>Narrow</i> |
| Uveitis                                   | C0042164 | 128473001 | Uveitis                                  | <b>Equal</b>  | H20    | <i>Iridocyclitis</i>                   | <i>Narrow</i> | 9A96          | <i>Anterior uveitis</i>                               | <i>Subgroup</i> | Uveitis NOS            | <b>Equal</b>  |
| Varicella zoster conjunctivitis           | N/A      | 410509003 | Herpes zoster conjunctivitis             | <b>Equal</b>  | B02.31 | Zoster conjunctivitis                  | <b>Equal</b>  | 1E91.1        | <i>Ophthalmic zoster</i>                              | <i>Wide</i>     | No                     | <i>Wide</i>   |
| Varicella zoster dermatoblepharitis       | N/A      | 41446000  | <i>Blepharitis</i>                       | <i>Wide</i>   | B02.39 | <i>Other herpes zoster eye disease</i> | <i>Wide</i>   | 1E91.1/9A01.3 | Zoster infection of eyelid                            | <b>Equal</b>    | No                     | <b>Equal</b>  |
| Varicella zoster Keratitis                | N/A      | 397573005 | Herpes zoster keratitis                  | <b>Equal</b>  | B02.33 | Zoster keratitis                       | <b>Equal</b>  | 1E91.1        | <i>Ophthalmic zoster</i>                              | <i>Wide</i>     | No                     | <i>Wide</i>   |
| Viral conjunctivitis                      | C0009774 | 45261009  | Viral conjunctivitis                     | <b>Equal</b>  | B30    | Viral conjunctivitis                   | <b>Equal</b>  | 1D84          | Viral conjunctivitis                                  | <b>Equal</b>    | No                     | <b>Equal</b>  |
| Viral keratitis                           | C0847226 | 314020001 | Viral keratitis                          | <b>Equal</b>  | H16.8  | <i>Other keratitis</i>                 | <i>Wide</i>   | 9A71          | <i>Infectious keratitis</i>                           | <i>Subgroup</i> | Viral keratitis        | <b>Equal</b>  |
| Viral retinitis                           | C0339406 | 231984002 | Viral retinitis                          | <b>Equal</b>  | H30    | <i>Chorioretinal inflammation</i>      | <i>Wide</i>   | 9B72.0        | Viral retinitis                                       | <b>Equal</b>    | No                     | <b>Equal</b>  |
| Viral uveitis                             | C5567796 | 1.28E+08  | <i>Uveitis</i>                           | <i>Wide</i>   | H20    | <i>Iridocyclitis</i>                   | <i>Wide</i>   | 9C20.1        | <i>Infectious panuveitis</i>                          | <i>Wide</i>     | No                     | <i>Wide</i>   |
| Virus panuveitis                          | C5396736 | 870329005 | Panuveitis caused by virus               | <b>Equal</b>  | H44.11 | <i>Panuveitis</i>                      | <i>Wide</i>   | 9C20.1        | <i>Infectious panuveitis</i>                          | <i>Subgroup</i> | Other viral panuveitis | <b>Equal</b>  |
| Vitreous abscess                          | C0042904 | 48142003  | Vitreous abscess                         | <b>Equal</b>  | H44.02 | <i>Vitreous abscess (chronic)</i>      | <i>Narrow</i> | 9C20.2        | <i>Purulent endophthalmitis</i>                       | <i>Subgroup</i> | Vitreous abscess       | <b>Equal</b>  |
| Vitritis                                  | C0235812 | 95802009  | Vitritis                                 | <b>Equal</b>  | H43    | <i>Disorders of vitreous body</i>      | <i>Wide</i>   | 9B8Y          | <i>Other specified disorders of the vitreous body</i> | <i>Wide</i>     | No                     | <i>Wide</i>   |
| West Nile virus chorioretinitis           | N/A      | 46627006  | <i>Chorioretinitis</i>                   | <i>Wide</i>   | H30    | <i>Chorioretinal inflammation</i>      | <i>Wide</i>   | 9B65.2        | <i>Chorioretinal inflammation</i>                     | <i>Wide</i>     | No                     | <i>Wide</i>   |
| Zika virus chorioretinitis                | N/A      | 46627006  | <i>Chorioretinitis</i>                   | <i>Wide</i>   | H30    | <i>Chorioretinal inflammation</i>      | <i>Wide</i>   | 9B65.2        | <i>Chorioretinal inflammation</i>                     | <i>Wide</i>     | No                     | <i>Wide</i>   |
| Zygomycosis                               | C0043541 | 59277005  | Zygomycosis                              | <b>Equal</b>  | B46    | Zygomycosis                            | <b>Equal</b>  | 1F2C          | <i>Mucormycosis</i>                                   | <i>Subgroup</i> | Zygomycosis            | <b>Equal</b>  |

UMLS = Unified Medical Language System; SNOMED-CT = Systemized Nomenclature of Medicine Clinical Terms; ICD-10-CM=International Classification of Diseases, version 10 Clinical Modification; ICD-11=International Classification of Diseases, version 11

Table S3 includes all the ophthalmic infection concepts found in the BCSC book and the codes in the different data sets.
